# Supplementary material
Source: MDPI journal article supplement (https://www.mdpi.com/1996-1073/16/18/6725)
Supplement: s1 [file s1]

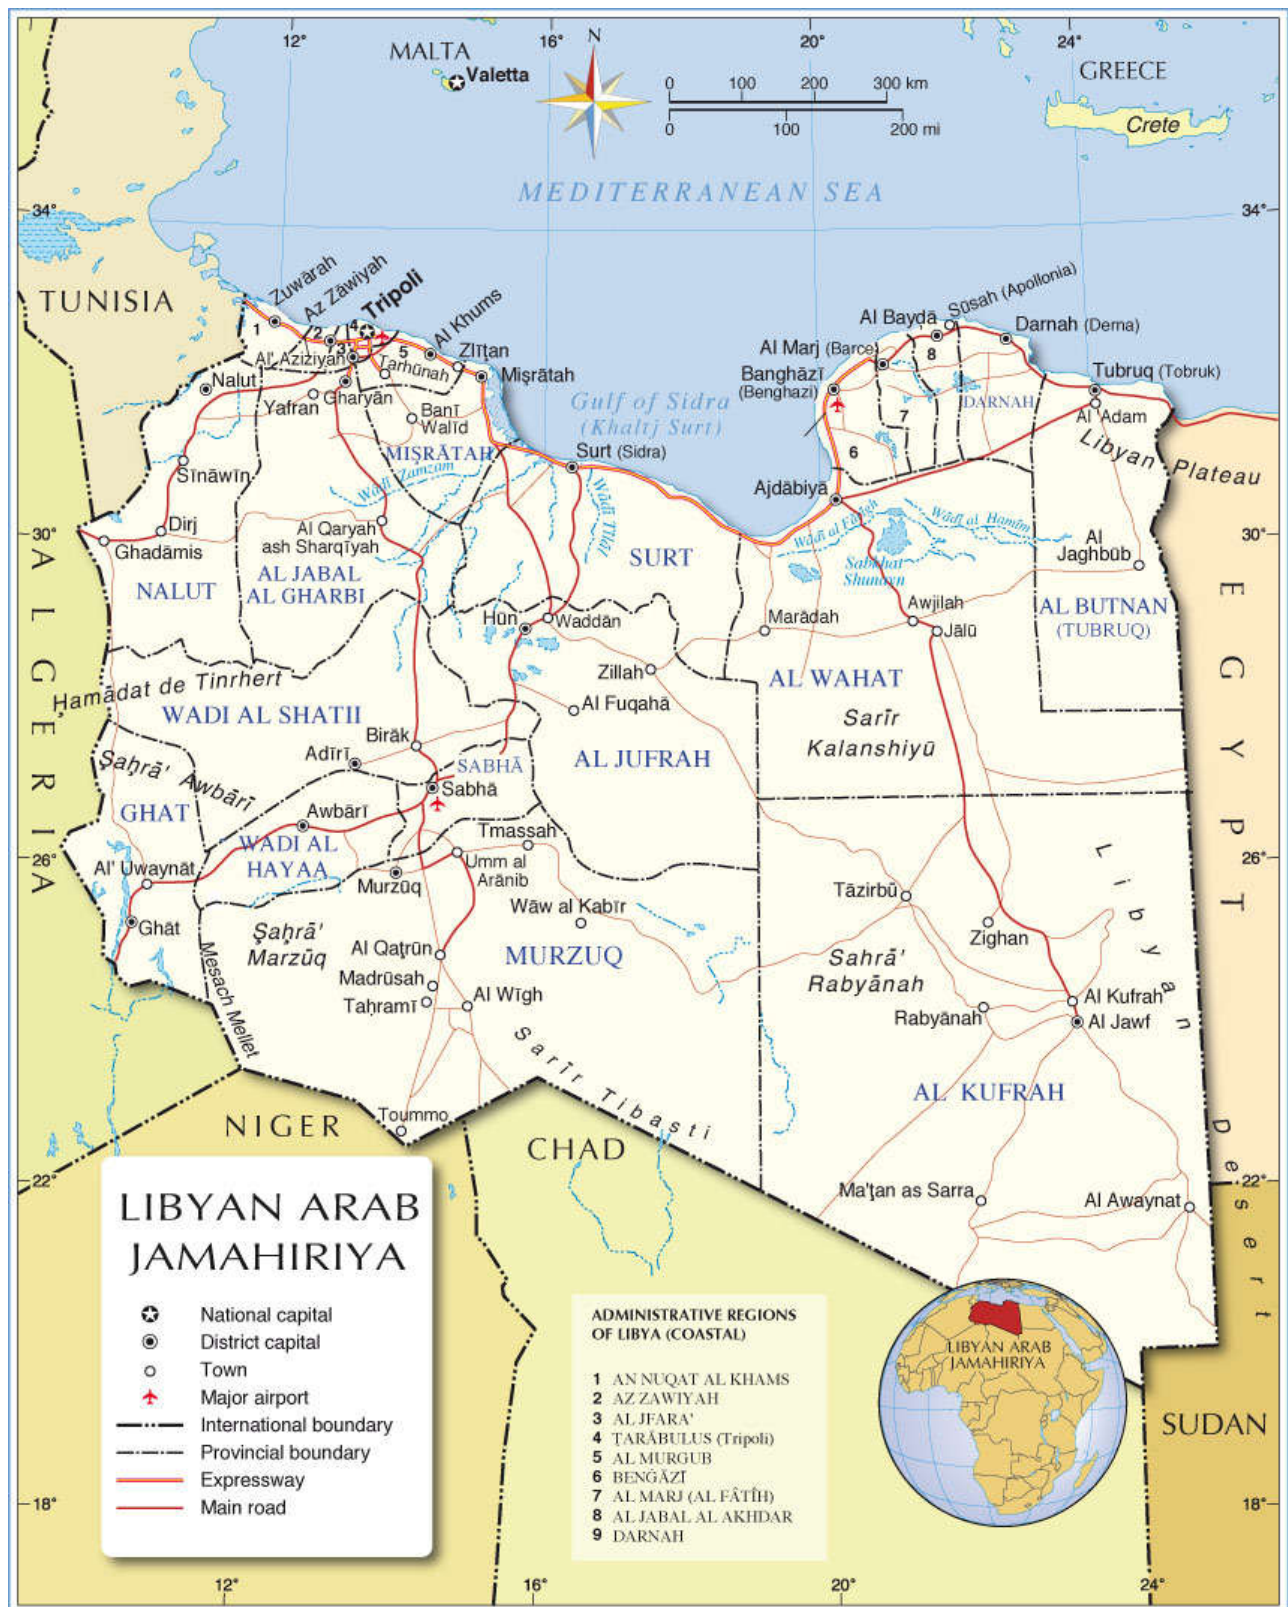

Figure S1: Libya map

**Table S1.** Utilization of the satellite database for evaluating the potential of wind energy in various regions

| Reference | Location/Country                                                  | Data source                                        |
|-----------|-------------------------------------------------------------------|----------------------------------------------------|
| [78]      | Antarctic                                                         | ERA reanalysis and RACMO2/ANT                      |
| [79]      | Iberian Peninsula                                                 | NASA's Sea Winds                                   |
| [80]      | Europe                                                            | ERA-Interim                                        |
| [81]      | Africa                                                            | VORTEX                                             |
| [82]      | India                                                             | NASA                                               |
| [83]      | Kribi/ Cameroon                                                   | NASA                                               |
| [84]      | European Coasts                                                   | ERA-Interim, ERA20C, and NCEP                      |
| [85]      | Germany, Denmark, France, Sweden, and Bonneville.                 | MERRA-2 and ERA5                                   |
| [86]      | Portugal                                                          | NCEP-R2, ERA-Interim, NASA-MERRA and NCEP-CFSR     |
| [87]      | Republic of Djibouti                                              | NCEP-CFSR and ERA5                                 |
| [88]      | Algeria                                                           | ERA-Interim                                        |
| [89]      | South Sudan                                                       | TerraClimate data                                  |
| [90]      | Cameroon                                                          | NASA satellite                                     |
| [91]      | Northern Hemisphere                                               | ERA-Interim, JRA-55, CFS, and MERRA-2.             |
| [92]      | Colombia                                                          | ERA5 reanalyses                                    |
| [93]      | FINO3, Cabauw, Boulder, Ghoroghchi, Humansdorp, and Wallaby Creek | ERA5 reanalyses                                    |
| [94]      | Northern Cyprus                                                   | European Centre for Medium-Range Weather Forecasts |
| [95]      | Global                                                            | ERA5 reanalyses                                    |
| [96]      | Algeria                                                           | ERA5 reanalyses                                    |

**Table S2.** Model performance rating based on RRMSE

| Performance rating | Range of RRMSE           |
|--------------------|--------------------------|
| Excellent          | < 10%                    |
| Good               | 10% < <i>RRMSE</i> < 20% |
| Fair               | 20% < <i>RRMSE</i> < 30% |
| Poor               | > 30%                    |

**Table S3.** Summary of reviewed studies on analyzing WSC at different locations (worldwide) using various distribution functions (DFs)

| Reference | Region                              | DFs used                                                                                                                                                                                                                                                                                                                                                                                                                                                                                                                                                                                                                                                                                                     |
|-----------|-------------------------------------|--------------------------------------------------------------------------------------------------------------------------------------------------------------------------------------------------------------------------------------------------------------------------------------------------------------------------------------------------------------------------------------------------------------------------------------------------------------------------------------------------------------------------------------------------------------------------------------------------------------------------------------------------------------------------------------------------------------|
| [101]     | United Arab Emirates                | Gamma, generalized extreme value, generalized Gamma, Kappa, Kernel density, 2-parameter Lognormal, 3-parameter Lognormal, Pearson type III, 2-parameter Weibull, 3-parameter Weibull and Gumbel                                                                                                                                                                                                                                                                                                                                                                                                                                                                                                              |
| [102]     | Northern Cyprus                     | 2-parameter Weibull, Gamma, Lognormal, Logistic, Log-Logistic, Inverse Gaussian, Generalized Extreme Value, Nakagami, Normal and Rayleigh                                                                                                                                                                                                                                                                                                                                                                                                                                                                                                                                                                    |
| [103]     | Pakistan                            | 2-parameter Weibull, Gamma, Lognormal, Logistic, Log-Logistic, Inverse Gaussian, Generalized Extreme Value, Nakagami, Normal and Rayleigh                                                                                                                                                                                                                                                                                                                                                                                                                                                                                                                                                                    |
| [104]     | East and southeast parts of Iran    | Exponential, Weibull, Gamma, Lognormal, Inverse Gaussian, Log-Logistic, Generalized extreme value and Nakagami                                                                                                                                                                                                                                                                                                                                                                                                                                                                                                                                                                                               |
| [105]     | Peninsular Malaysia                 | Weibull, Gamma and Inverse Gamma                                                                                                                                                                                                                                                                                                                                                                                                                                                                                                                                                                                                                                                                             |
| [106]     | Güzelyurt region in northern Cyprus | Beta, Burr, 4-parameter Burr, Cauchy, Dagum, 4-parameter Dagum, Erlang, 3-parameter Erlang, Exponential, 2-parameters Exponential, Gamma, 3-parameter Gamma, Generalized Extreme Value, Generalized Gamma, 4-parameter Generalized Gamma, Generalized Logistic, Generalized Pareto, Gumbel Max, Gumbel Min, Inverse Gaussian, 43-parameter Inverse Gaussian, Log-Gamma, Log-Logistic, 3-parameter Log-Logistic, 3-parameter Log-Pearson, Logistic, Lognormal, 3-parameter Lognormal, Nakagami, Normal, Pareto, 2-parameter Pareto, Rayleigh, 2-parameter Rayleigh, Wakeby, Weibull, and 3-parameter Weibull                                                                                                  |
| [107]     | Tamil Nadu, India                   | Exponential, gamma, generalised extreme value, inverse Gaussian, Kumaraswamy, log-logistic, lognormal, Nakagami, and Weibull                                                                                                                                                                                                                                                                                                                                                                                                                                                                                                                                                                                 |
| [108]     | Red Sea State, Sudan                | Beta, Burr, 4-parameter Burr, Cauchy, Dagum, 4-parameter Dagum, Erlang, 3-parameter Erlang, Exponential, 2-parameters Exponential, Gamma, 3-parameter Gamma, Generalized Extreme Value, Generalized Gamma, 4-parameter Generalized Gamma, Generalized Logistic, Generalized Pareto, Gumbel Max, Gumbel Min, Inverse Gaussian, 43-parameter Inverse Gaussian, Log-Gamma, Log-Logistic, 3-parameter Log-Logistic, 3-parameter Log-Pearson, Logistic, Lognormal, 3-parameter Lognormal, Nakagami, Normal, Pareto, 2-parameter Pareto, Rayleigh, 2-parameter Rayleigh, Wakeby, Weibull, and 3-parameter Weibull                                                                                                  |
| [109]     | Algeria                             | Weibull, Gamma, Inverse Gaussian, Log Normal, Gumbel, Generalized extreme value, Nakagami, and Generalized Logistic                                                                                                                                                                                                                                                                                                                                                                                                                                                                                                                                                                                          |
| [110]     | Poland                              | 2-parameter Weibull, and 3-parameter Weibull                                                                                                                                                                                                                                                                                                                                                                                                                                                                                                                                                                                                                                                                 |
| [111]     | Southern coasts of Iran             | Weibull, Gamma, Lognormal, Generalized extreme value, Rayleigh and Inverse Gaussian                                                                                                                                                                                                                                                                                                                                                                                                                                                                                                                                                                                                                          |
| [112]     | Lebanon                             | 2-parameter Weibull, Gamma, Lognormal, Logistic, Log-Logistic, Inverse Gaussian, Generalized Extreme Value, Nakagami, Normal and Rayleigh                                                                                                                                                                                                                                                                                                                                                                                                                                                                                                                                                                    |
| [113]     | Northern Lebanon                    | 2-parameter Weibull, Gamma, Lognormal, Logistic, Log-Logistic, Inverse Gaussian, Generalized Extreme Value, Nakagami, Normal and Rayleigh                                                                                                                                                                                                                                                                                                                                                                                                                                                                                                                                                                    |
| [114]     | New South Wales, Australia          | Rayleigh, Weibull, Gamma, and Lognormal                                                                                                                                                                                                                                                                                                                                                                                                                                                                                                                                                                                                                                                                      |
| [115]     | Lebanon                             | Beta, Burr, 4-parameter Burr, Cauchy, Dagum, Pearson 5, Pareto 2, Pareto, 3-parameter Pearson 5, Pearson 6, 4-parameter Pearson 6, Reciprocal, 4-parameter Dagum, Erlang, 3-parameter Erlang, Exponential, 2-parameters Exponential, Gamma, 3-parameter Gamma, Generalized Extreme Value, Generalized Gamma, 4-parameter Generalized Gamma, Generalized Logistic, Generalized Pareto, Gumbel Max, Gumbel Min, Inverse Gaussian, 3-parameter Inverse Gaussian, Log-Gamma, Log-Logistic, 3-parameter Log-Logistic, 3-parameter Log-Pearson, Logistic, Lognormal, 3-parameter Lognormal, Nakagami, Normal, Pareto, 2-parameter Pareto, Rayleigh, 2-parameter Rayleigh, Wakeby, Weibull, and 3-parameter Weibull |

**Table S4.** Distribution parameters for all models used based on daily measured data

|          | Model | Parameters                                                 | KS        |      |
|----------|-------|------------------------------------------------------------|-----------|------|
|          |       |                                                            | Statistic | Rank |
| January  | W-3P  | $\alpha=0.90202$ $\beta=1.5061$ $\gamma=1.9856$            | 0.112     | 1    |
|          | BS    | $\alpha=0.92529$ $\beta=1.1559$ $\gamma=1.8191$            | 0.134     | 2    |
|          | K     | $\alpha_1=0.72313$ $\alpha_2=2.0247$ $a=1.9856$ $b=8.3624$ | 0.135     | 3    |
|          | GEV   | $k=0.28759$ $\sigma=0.775$ $\mu=2.718$                     | 0.158     | 4    |
|          | IG    | $\lambda=20.108$ $\mu=3.4694$                              | 0.169     | 5    |
|          | G     | $\alpha=5.7957$ $\beta=0.59862$                            | 0.174     | 6    |
|          | LL    | $\alpha=4.4959$ $\beta=3.1473$                             | 0.175     | 7    |
|          | W     | $\alpha=2.9968$ $\beta=3.764$                              | 0.194     | 8    |
|          | LN    | $\sigma=0.35959$ $\mu=1.1738$                              | 0.201     | 9    |
|          | N     | $\sigma=1.4411$ $\mu=3.4694$                               | 0.204     | 10   |
|          | Na    | $m=1.2256$ $\Omega=14.047$                                 | 0.209     | 11   |
|          | L     | $\sigma=0.79453$ $\mu=3.4694$                              | 0.226     | 12   |
|          | R     | $\sigma=2.7682$                                            | 0.232     | 13   |
| February | K     | $\alpha_1=0.96782$ $\alpha_2=2.3675$ $a=1.998$ $b=7.1638$  | 0.083     | 1    |
|          | W-3P  | $\alpha=1.2016$ $\beta=1.5998$ $\gamma=1.9819$             | 0.084     | 2    |
|          | GEV   | $k=0.11749$ $\sigma=0.86654$ $\mu=2.8768$                  | 0.095     | 3    |
|          | LL    | $\alpha=4.9855$ $\beta=3.2307$                             | 0.101     | 4    |
|          | BS    | $\alpha=0.74069$ $\beta=1.4035$ $\gamma=1.6993$            | 0.105     | 5    |
|          | IG    | $\lambda=28.793$ $\mu=3.4901$                              | 0.112     | 6    |
|          | G     | $\alpha=8.25$ $\beta=0.42304$                              | 0.118     | 7    |
|          | Na    | $m=1.9108$ $\Omega=13.604$                                 | 0.125     | 8    |
|          | LN    | $\sigma=0.32219$ $\mu=1.1962$                              | 0.127     | 9    |
|          | W     | $\alpha=3.4021$ $\beta=3.7789$                             | 0.131     | 10   |
|          | N     | $\sigma=1.2151$ $\mu=3.4901$                               | 0.154     | 11   |
|          | L     | $\sigma=0.66991$ $\mu=3.4901$                              | 0.172     | 12   |
|          | R     | $\sigma=2.7847$                                            | 0.227     | 13   |
| March    | GEV   | $k=0.08641$ $\sigma=0.911$ $\mu=3.207$                     | 0.083     | 1    |
|          | LL    | $\alpha=5.5427$ $\beta=3.5587$                             | 0.083     | 2    |
|          | BS    | $\alpha=0.5037$ $\beta=2.2021$ $\gamma=1.3358$             | 0.084     | 3    |
|          | W-3P  | $\alpha=1.4578$ $\beta=1.968$ $\gamma=2.0315$              | 0.091     | 4    |
|          | LN    | $\sigma=0.30321$ $\mu=1.2921$                              | 0.093     | 5    |
|          | IG    | $\lambda=35.446$ $\mu=3.8175$                              | 0.099     | 6    |
|          | W     | $\alpha=3.8255$ $\beta=4.0942$                             | 0.107     | 7    |
|          | K     | $\alpha_1=0.96594$ $\alpha_2=2.2277$ $a=2.0892$ $b=7.8007$ | 0.116     | 8    |
|          | G     | $\alpha=9.2852$ $\beta=0.41114$                            | 0.117     | 9    |
|          | Na    | $m=2.0189$ $\Omega=16.092$                                 | 0.131     | 10   |
|          | L     | $\sigma=0.69071$ $\mu=3.8175$                              | 0.140     | 11   |
|          | N     | $\sigma=1.2528$ $\mu=3.8175$                               | 0.155     | 12   |
|          | R     | $\sigma=3.0459$                                            | 0.215     | 13   |

**Table S4.** Continued

|       | Model | Parameters                                                 | KS        |      |
|-------|-------|------------------------------------------------------------|-----------|------|
|       |       |                                                            | Statistic | Rank |
| April | GEV   | $k=-0.09812$ $\sigma=1.0965$ $\mu=3.7969$                  | 0.101     | 1    |
|       | G     | $\alpha=12.754$ $\beta=0.33967$                            | 0.106     | 2    |
|       | Na    | $m=3.2898$ $\Omega=20.189$                                 | 0.108     | 3    |
|       | W-3P  | $\alpha=2.098$ $\beta=2.6821$ $\gamma=1.9575$              | 0.109     | 4    |
|       | BS    | $\alpha=0.27718$ $\beta=4.2204$ $\gamma=-0.0505$           | 0.109     | 5    |
|       | LN    | $\sigma=0.2787$ $\mu=1.4277$                               | 0.109     | 6    |
|       | IG    | $\lambda=55.249$ $\mu=4.3321$                              | 0.111     | 7    |
|       | LL    | $\alpha=5.7365$ $\beta=4.1001$                             | 0.113     | 8    |
|       | N     | $\sigma=1.2131$ $\mu=4.3321$                               | 0.129     | 9    |
|       | W     | $\alpha=4.0452$ $\beta=4.6801$                             | 0.130     | 10   |
|       | L     | $\sigma=0.66879$ $\mu=4.3321$                              | 0.144     | 11   |
|       | K     | $\alpha_1=0.84624$ $\alpha_2=1.0777$ $a=2.2159$ $b=6.7994$ | 0.155     | 12   |
|       | R     | $\sigma=3.4565$                                            | 0.240     | 13   |
| May   | W     | $\alpha=4.3227$ $\beta=3.6114$                             | 0.071     | 1    |
|       | IG    | $\lambda=37.36$ $\mu=3.3913$                               | 0.081     | 2    |
|       | G     | $\alpha=11.017$ $\beta=0.30784$                            | 0.091     | 3    |
|       | K     | $\alpha_1=0.66376$ $\alpha_2=1.5493$ $a=2.239$ $b=7.1381$  | 0.093     | 4    |
|       | Na    | $m=2.2333$ $\Omega=12.511$                                 | 0.094     | 5    |
|       | L     | $\sigma=0.56332$ $\mu=3.3913$                              | 0.095     | 6    |
|       | GEV   | $k=0.17937$ $\sigma=0.65015$ $\mu=2.8772$                  | 0.119     | 7    |
|       | BS    | $\alpha=0.80815$ $\beta=1.0228$ $\gamma=2.0318$            | 0.150     | 8    |
|       | LL    | $\alpha=6.3769$ $\beta=3.1901$                             | 0.160     | 9    |
|       | W-3P  | $\alpha=1.0689$ $\beta=1.1833$ $\gamma=2.2359$             | 0.168     | 10   |
|       | N     | $\sigma=1.0217$ $\mu=3.3913$                               | 0.171     | 11   |
|       | R     | $\sigma=2.7059$                                            | 0.185     | 12   |
|       | LN    | $\sigma=0.2679$ $\mu=1.1831$                               | 0.198     | 13   |
| June  | LL    | $\alpha=8.1103$ $\beta=3.1914$                             | 0.089     | 1    |
|       | GEV   | $k=-0.06857$ $\sigma=0.60534$ $\mu=2.9981$                 | 0.102     | 2    |
|       | BS    | $\alpha=0.25363$ $\beta=2.6301$ $\gamma=0.59421$           | 0.105     | 3    |
|       | LN    | $\sigma=0.20471$ $\mu=1.1756$                              | 0.114     | 4    |
|       | W-3P  | $\alpha=1.9943$ $\beta=1.4825$ $\gamma=1.9933$             | 0.114     | 5    |
|       | G     | $\alpha=22.523$ $\beta=0.14691$                            | 0.127     | 6    |
|       | Na    | $m=5.4127$ $\Omega=11.419$                                 | 0.136     | 7    |
|       | W     | $\alpha=5.6954$ $\beta=3.5058$                             | 0.141     | 8    |
|       | K     | $\alpha_1=0.89491$ $\alpha_2=1.4045$ $a=2.1447$ $b=5.133$  | 0.150     | 9    |
|       | L     | $\sigma=0.3844$ $\mu=3.3089$                               | 0.155     | 10   |
|       | N     | $\sigma=0.69722$ $\mu=3.3089$                              | 0.155     | 11   |
|       | IG    | $\lambda=74.526$ $\mu=3.3089$                              | 0.155     | 12   |
|       | R     | $\sigma=2.6401$                                            | 0.281     | 13   |

Table S4. Continued

|           | Model | Parameters                                                 | KS        |      |
|-----------|-------|------------------------------------------------------------|-----------|------|
|           |       |                                                            | Statistic | Rank |
| July      | GEV   | $k=-0.27709$ $\sigma=0.65494$ $\mu=2.7991$                 | 0.092     | 1    |
|           | W     | $\alpha=5.3355$ $\beta=3.2365$                             | 0.097     | 2    |
|           | N     | $\sigma=0.64012$ $\mu=3.0326$                              | 0.103     | 3    |
|           | K     | $\alpha_1=0.87641$ $\alpha_2=1.1263$ $a=1.9447$ $b=4.4331$ | 0.106     | 4    |
|           | BS    | $\alpha=0.05171$ $\beta=12.172$ $\gamma=-9.156$            | 0.107     | 5    |
|           | Na    | $m=5.961$ $\Omega=9.5929$                                  | 0.108     | 6    |
|           | W-3P  | $\alpha=2.3328$ $\beta=1.5427$ $\gamma=1.6668$             | 0.111     | 7    |
|           | G     | $\alpha=22.444$ $\beta=0.13512$                            | 0.113     | 8    |
|           | L     | $\sigma=0.35292$ $\mu=3.0326$                              | 0.121     | 9    |
|           | LN    | $\sigma=0.21398$ $\mu=1.087$                               | 0.122     | 10   |
|           | IG    | $\lambda=68.061$ $\mu=3.0326$                              | 0.132     | 11   |
|           | LL    | $\alpha=7.4585$ $\beta=2.927$                              | 0.142     | 12   |
|           | R     | $\sigma=2.4196$                                            | 0.276     | 13   |
| August    | GEV   | $k=0.1618$ $\sigma=0.51417$ $\mu=2.482$                    | 0.072     | 1    |
|           | LL    | $\alpha=6.7455$ $\beta=2.7315$                             | 0.081     | 2    |
|           | BS    | $\alpha=0.48017$ $\beta=1.4158$ $\gamma=1.297$             | 0.085     | 3    |
|           | W-3P  | $\alpha=1.5423$ $\beta=1.2879$ $\gamma=1.7178$             | 0.105     | 4    |
|           | LN    | $\sigma=0.24797$ $\mu=1.024$                               | 0.116     | 5    |
|           | IG    | $\lambda=38.017$ $\mu=2.8759$                              | 0.120     | 6    |
|           | G     | $\alpha=13.219$ $\beta=0.21755$                            | 0.137     | 7    |
|           | W     | $\alpha=4.5767$ $\beta=3.071$                              | 0.140     | 8    |
|           | Na    | $m=2.7665$ $\Omega=8.8761$                                 | 0.146     | 9    |
|           | K     | $\alpha_1=0.9692$ $\alpha_2=1.8251$ $a=1.7586$ $b=5.0853$  | 0.148     | 10   |
|           | L     | $\sigma=0.43609$ $\mu=2.8759$                              | 0.163     | 11   |
|           | N     | $\sigma=0.79099$ $\mu=2.8759$                              | 0.172     | 12   |
|           | R     | $\sigma=2.2946$                                            | 0.273     | 13   |
| September | LN    | $\sigma=0.16736$ $\mu=1.0878$                              | 0.081     | 1    |
|           | BS    | $\alpha=0.25927$ $\beta=1.9203$ $\gamma=1.0251$            | 0.087     | 2    |
|           | GEV   | $k=-0.05567$ $\sigma=0.44379$ $\mu=2.7771$                 | 0.093     | 3    |
|           | G     | $\alpha=32.858$ $\beta=0.0916$                             | 0.095     | 4    |
|           | LL    | $\alpha=9.9404$ $\beta=2.9306$                             | 0.097     | 5    |
|           | W     | $\alpha=6.9148$ $\beta=3.1665$                             | 0.100     | 6    |
|           | W-3P  | $\alpha=1.9687$ $\beta=1.1047$ $\gamma=2.0291$             | 0.103     | 7    |
|           | Na    | $m=7.6731$ $\Omega=9.3264$                                 | 0.106     | 8    |
|           | L     | $\sigma=0.2895$ $\mu=3.01$                                 | 0.108     | 9    |
|           | N     | $\sigma=0.5251$ $\mu=3.01$                                 | 0.112     | 10   |
|           | IG    | $\lambda=98.902$ $\mu=3.01$                                | 0.117     | 11   |
|           | K     | $\alpha_1=0.83696$ $\alpha_2=1.1156$ $a=2.1288$ $b=4.3199$ | 0.181     | 12   |
|           | R     | $\sigma=2.4016$                                            | 0.325     | 13   |

Table S4. Continued

|          | Model | Parameters                                                 | KS        |      |
|----------|-------|------------------------------------------------------------|-----------|------|
|          |       |                                                            | Statistic | Rank |
| October  | K     | $\alpha_1=0.92564$ $\alpha_2=2.3776$ $a=1.7988$ $b=4.4167$ | 0.112     | 1    |
|          | W-3P  | $\alpha=0.86194$ $\beta=0.65758$ $\gamma=1.7988$           | 0.122     | 2    |
|          | LN    | $\sigma=0.22896$ $\mu=0.88908$                             | 0.127     | 3    |
|          | GEV   | $k=0.10685$ $\sigma=0.44329$ $\mu=2.192$                   | 0.131     | 4    |
|          | LL    | $\alpha=7.0784$ $\beta=2.3917$                             | 0.134     | 5    |
|          | G     | $\alpha=16.477$ $\beta=0.15172$                            | 0.134     | 6    |
|          | BS    | $\alpha=0.96885$ $\beta=0.52661$ $\gamma=1.7212$           | 0.136     | 7    |
|          | Na    | $m=3.7487$ $\Omega=6.6165$                                 | 0.145     | 8    |
|          | W     | $\alpha=4.8018$ $\beta=2.6742$                             | 0.153     | 9    |
|          | N     | $\sigma=0.61586$ $\mu=2.4999$                              | 0.165     | 10   |
|          | IG    | $\lambda=41.191$ $\mu=2.4999$                              | 0.167     | 11   |
|          | L     | $\sigma=0.33954$ $\mu=2.4999$                              | 0.176     | 12   |
|          | R     | $\sigma=1.9946$                                            | 0.334     | 13   |
| November | K     | $\alpha_1=0.81574$ $\alpha_2=1.6662$ $a=1.7568$ $b=7.3267$ | 0.096     | 1    |
|          | W-3P  | $\alpha=1.1934$ $\beta=1.9202$ $\gamma=1.7392$             | 0.111     | 2    |
|          | Na    | $m=1.4941$ $\Omega=14.63$                                  | 0.121     | 3    |
|          | LL    | $\alpha=4.1674$ $\beta=3.2088$                             | 0.126     | 4    |
|          | GEV   | $k=0.05569$ $\sigma=1.1051$ $\mu=2.852$                    | 0.132     | 5    |
|          | BS    | $\alpha=0.7786$ $\beta=1.6231$ $\gamma=1.4339$             | 0.133     | 6    |
|          | G     | $\alpha=6.1105$ $\beta=0.58164$                            | 0.139     | 7    |
|          | W     | $\alpha=2.8848$ $\beta=3.863$                              | 0.140     | 8    |
|          | IG    | $\lambda=21.717$ $\mu=3.5541$                              | 0.141     | 9    |
|          | LN    | $\sigma=0.38622$ $\mu=1.1925$                              | 0.147     | 10   |
|          | N     | $\sigma=1.4378$ $\mu=3.5541$                               | 0.158     | 11   |
|          | R     | $\sigma=2.8358$                                            | 0.179     | 12   |
|          | L     | $\sigma=0.79269$ $\mu=3.5541$                              | 0.180     | 13   |
| December | GEV   | $k=-0.2544$ $\sigma=1.0578$ $\mu=2.9325$                   | 0.100     | 1    |
|          | N     | $\sigma=1.0756$ $\mu=3.3254$                               | 0.101     | 2    |
|          | Na    | $m=2.4818$ $\Omega=12.178$                                 | 0.113     | 3    |
|          | BS    | $\alpha=0.15604$ $\beta=6.7169$ $\gamma=-3.4732$           | 0.121     | 4    |
|          | W-3P  | $\alpha=1.969$ $\beta=2.2715$ $\gamma=1.3074$              | 0.122     | 5    |
|          | L     | $\sigma=0.59304$ $\mu=3.3254$                              | 0.122     | 6    |
|          | G     | $\alpha=9.5578$ $\beta=0.34793$                            | 0.126     | 7    |
|          | W     | $\alpha=3.4291$ $\beta=3.5999$                             | 0.129     | 8    |
|          | LN    | $\sigma=0.33672$ $\mu=1.1476$                              | 0.132     | 9    |
|          | IG    | $\lambda=31.784$ $\mu=3.3254$                              | 0.140     | 10   |
|          | LL    | $\alpha=4.7119$ $\beta=3.0787$                             | 0.147     | 11   |
|          | K     | $\alpha_1=0.9587$ $\alpha_2=1.8915$ $a=1.5952$ $b=6.6033$  | 0.155     | 12   |
|          | R     | $\sigma=2.6533$                                            | 0.196     | 13   |

**Table S5.** Distribution parameters for all models used based on daily CFSR data

|          | Model | Parameters                                               | KS        |      |
|----------|-------|----------------------------------------------------------|-----------|------|
|          |       |                                                          | Statistic | Rank |
| January  | BS    | $\alpha=0.77429$ $\beta=1.5107$ $\gamma=1.2535$          | 0.09978   | 1    |
|          | W-3P  | $\alpha=1.1529$ $\beta=1.7846$ $\gamma=1.5189$           | 0.10105   | 2    |
|          | GEV   | $k=0.23663$ $\sigma=0.8718$ $\mu=2.4504$                 | 0.11368   | 3    |
|          | IG    | $\lambda=15.228$ $\mu=3.2168$                            | 0.12663   | 4    |
|          | LL    | $\alpha=3.9886$ $\beta=2.8631$                           | 0.12799   | 5    |
|          | G     | $\alpha=4.7339$ $\beta=0.67952$                          | 0.13648   | 6    |
|          | LN    | $\sigma=0.40641$ $\mu=1.0803$                            | 0.15167   | 7    |
|          | W     | $\alpha=2.6937$ $\beta=3.4938$                           | 0.15896   | 8    |
|          | N     | $\sigma=1.4785$ $\mu=3.2168$                             | 0.18278   | 9    |
|          | R     | $\sigma=2.5666$                                          | 0.18362   | 10   |
|          | Na    | $m=1.0477$ $\Omega=12.463$                               | 0.18427   | 11   |
|          | K     | $\alpha_1=0.90713$ $\alpha_2=1.5087$ $a=1.53$ $b=6.9719$ | 0.19963   | 12   |
|          | L     | $\sigma=0.81512$ $\mu=3.2168$                            | 0.20207   | 13   |
| February | GEV   | $k=0.07305$ $\sigma=0.65211$ $\mu=2.7788$                | 0.10501   | 1    |
|          | BS    | $\alpha=0.4618$ $\beta=1.7039$ $\gamma=1.32$             | 0.10787   | 2    |
|          | LL    | $\alpha=6.4509$ $\beta=3.0414$                           | 0.11219   | 3    |
|          | W-3P  | $\alpha=1.5511$ $\beta=1.4588$ $\gamma=1.8922$           | 0.12152   | 4    |
|          | IG    | $\lambda=43.237$ $\mu=3.2057$                            | 0.14167   | 5    |
|          | LN    | $\sigma=0.25424$ $\mu=1.1317$                            | 0.14402   | 6    |
|          | G     | $\alpha=13.487$ $\beta=0.23768$                          | 0.15866   | 7    |
|          | Na    | $m=3.0652$ $\Omega=11.011$                               | 0.1645    | 8    |
|          | K     | $\alpha_1=0.83388$ $\alpha_2=1.2611$ $a=1.95$ $b=5.294$  | 0.16928   | 9    |
|          | W     | $\alpha=4.4366$ $\beta=3.4298$                           | 0.17266   | 10   |
|          | N     | $\sigma=0.87289$ $\mu=3.2057$                            | 0.19489   | 11   |
|          | L     | $\sigma=0.48125$ $\mu=3.2057$                            | 0.19712   | 12   |
|          | R     | $\sigma=2.5578$                                          | 0.25878   | 13   |
| March    | LL    | $\alpha=5.3484$ $\beta=3.5563$                           | 0.08953   | 1    |
|          | GEV   | $k=0.11356$ $\sigma=0.93426$ $\mu=3.1969$                | 0.09246   | 2    |
|          | BS    | $\alpha=0.52545$ $\beta=2.2344$ $\gamma=1.3106$          | 0.09252   | 3    |
|          | W     | $\alpha=3.6949$ $\beta=4.1117$                           | 0.09495   | 4    |
|          | LN    | $\sigma=0.31954$ $\mu=1.2952$                            | 0.10219   | 5    |
|          | W-3P  | $\alpha=1.3898$ $\beta=2.0364$ $\gamma=1.9932$           | 0.10779   | 6    |
|          | IG    | $\lambda=29.845$ $\mu=3.8535$                            | 0.11469   | 7    |
|          | G     | $\alpha=7.7448$ $\beta=0.49756$                          | 0.13259   | 8    |
|          | L     | $\sigma=0.76342$ $\mu=3.8535$                            | 0.14714   | 9    |
|          | Na    | $m=1.4972$ $\Omega=16.705$                               | 0.15843   | 10   |
|          | K     | $\alpha_1=0.92059$ $\alpha_2=3.0432$ $a=2.04$ $b=9.6596$ | 0.16121   | 11   |
|          | N     | $\sigma=1.3847$ $\mu=3.8535$                             | 0.1668    | 12   |
|          | R     | $\sigma=3.0747$                                          | 0.20768   | 13   |

Table S5. Continued



|       | Model | Parameters                                               | KS        |      |
|-------|-------|----------------------------------------------------------|-----------|------|
|       |       |                                                          | Statistic | Rank |
| April | LL    | $\alpha=6.0856$ $\beta=4.0961$                           | 0.07566   | 1    |
|       | GEV   | $k=0.08329$ $\sigma=0.93482$ $\mu=3.7189$                | 0.08181   | 2    |
|       | BS    | $\alpha=0.56181$ $\beta=2.0146$ $\gamma=2.0086$          | 0.09925   | 3    |
|       | LN    | $\sigma=0.27195$ $\mu=1.4301$                            | 0.10748   | 4    |
|       | IG    | $\lambda=50.103$ $\mu=4.342$                             | 0.11053   | 5    |
|       | W-3P  | $\alpha=1.2555$ $\beta=1.7872$ $\gamma=2.6709$           | 0.11066   | 6    |
|       | K     | $\alpha_1=0.94661$ $\alpha_2=1.9601$ $a=2.7$ $b=7.8513$  | 0.12358   | 7    |
|       | G     | $\alpha=11.539$ $\beta=0.37629$                          | 0.12857   | 8    |
|       | W     | $\alpha=4.1719$ $\beta=4.6568$                           | 0.13342   | 9    |
|       | Na    | $m=2.5339$ $\Omega=20.432$                               | 0.13901   | 10   |
|       | L     | $\sigma=0.70472$ $\mu=4.342$                             | 0.15661   | 11   |
|       | N     | $\sigma=1.2782$ $\mu=4.342$                              | 0.16562   | 12   |
|       | R     | $\sigma=3.4644$                                          | 0.26191   | 13   |
| May   | LL    | $\alpha=6.7261$ $\beta=3.6194$                           | 0.07951   | 1    |
|       | BS    | $\alpha=0.41587$ $\beta=2.3048$ $\gamma=1.3272$          | 0.08044   | 2    |
|       | GEV   | $k=0.05425$ $\sigma=0.79808$ $\mu=3.3255$                | 0.08345   | 3    |
|       | IG    | $\lambda=48.927$ $\mu=3.8313$                            | 0.08497   | 4    |
|       | W-3P  | $\alpha=1.6689$ $\beta=1.9063$ $\gamma=2.1277$           | 0.08528   | 5    |
|       | LN    | $\sigma=0.258$ $\mu=1.3088$                              | 0.08602   | 6    |
|       | G     | $\alpha=12.77$ $\beta=0.30002$                           | 0.09677   | 7    |
|       | W     | $\alpha=4.6923$ $\beta=4.0576$                           | 0.109     | 8    |
|       | N     | $\sigma=1.0721$ $\mu=3.8313$                             | 0.11751   | 9    |
|       | L     | $\sigma=0.59109$ $\mu=3.8313$                            | 0.11768   | 10   |
|       | Na    | $m=2.6604$ $\Omega=15.791$                               | 0.13463   | 11   |
|       | K     | $\alpha_1=0.90122$ $\alpha_2=1.8632$ $a=2.21$ $b=7.4793$ | 0.16483   | 12   |
|       | R     | $\sigma=3.0569$                                          | 0.27023   | 13   |
| June  | GEV   | $k=-0.26005$ $\sigma=0.80477$ $\mu=3.5648$               | 0.09215   | 1    |
|       | W     | $\alpha=5.4019$ $\beta=4.128$                            | 0.09504   | 2    |
|       | K     | $\alpha_1=1.0324$ $\alpha_2=0.93531$ $a=2.4895$ $b=5.21$ | 0.10279   | 3    |
|       | BS    | $\alpha=0.04888$ $\beta=15.925$ $\gamma=-12.084$         | 0.1061    | 4    |
|       | N     | $\sigma=0.79186$ $\mu=3.8607$                            | 0.10673   | 5    |
|       | Na    | $m=6.316$ $\Omega=15.511$                                | 0.10682   | 6    |
|       | W-3P  | $\alpha=2.5015$ $\beta=2.02$ $\gamma=2.071$              | 0.10939   | 7    |
|       | G     | $\alpha=23.77$ $\beta=0.16242$                           | 0.11508   | 8    |
|       | LN    | $\sigma=0.20749$ $\mu=1.3298$                            | 0.12341   | 9    |
|       | IG    | $\lambda=91.768$ $\mu=3.8607$                            | 0.12451   | 10   |
|       | L     | $\sigma=0.43657$ $\mu=3.8607$                            | 0.12839   | 11   |
|       | LL    | $\alpha=7.5959$ $\beta=3.7386$                           | 0.13722   | 12   |
|       | R     | $\sigma=3.0804$                                          | 0.27871   | 13   |

Table S5. Continued

|           | Model | Parameters                                                | KS        |      |
|-----------|-------|-----------------------------------------------------------|-----------|------|
|           |       |                                                           | Statistic | Rank |
| July      | GEV   | $k=-0.27295$ $\sigma=0.60819$ $\mu=3.3851$                | 0.08859   | 1    |
|           | K     | $\alpha_1=1.0542$ $\alpha_2=0.94101$ $a=2.4473$ $b=4.63$  | 0.09055   | 2    |
|           | N     | $\sigma=0.59372$ $\mu=3.6035$                             | 0.09884   | 3    |
|           | W     | $\alpha=6.8115$ $\beta=3.8127$                            | 0.0989    | 4    |
|           | W-3P  | $\alpha=2.8907$ $\beta=1.7093$ $\gamma=2.0829$            | 0.10134   | 5    |
|           | IG    | $\lambda=132.75$ $\mu=3.6035$                             | 0.10163   | 6    |
|           | BS    | $\alpha=0.0208$ $\beta=28.031$ $\gamma=-24.433$           | 0.1026    | 7    |
|           | Na    | $m=9.6385$ $\Omega=13.327$                                | 0.10497   | 8    |
|           | G     | $\alpha=36.838$ $\beta=0.09782$                           | 0.10768   | 9    |
|           | LN    | $\sigma=0.16556$ $\mu=1.2684$                             | 0.11187   | 10   |
|           | L     | $\sigma=0.32734$ $\mu=3.6035$                             | 0.11989   | 11   |
|           | LL    | $\alpha=9.5749$ $\beta=3.5241$                            | 0.12196   | 12   |
|           | R     | $\sigma=2.8752$                                           | 0.32152   | 13   |
| August    | GEV   | $k=0.08411$ $\sigma=0.49908$ $\mu=3.1798$                 | 0.11145   | 1    |
|           | BS    | $\alpha=0.45806$ $\beta=1.3378$ $\gamma=2.0347$           | 0.11328   | 2    |
|           | W-3P  | $\alpha=1.5593$ $\beta=1.141$ $\gamma=2.4862$             | 0.11473   | 3    |
|           | LL    | $\alpha=9.1032$ $\beta=3.4093$                            | 0.13667   | 4    |
|           | Na    | $m=6.1028$ $\Omega=12.786$                                | 0.15499   | 5    |
|           | G     | $\alpha=26.823$ $\beta=0.13097$                           | 0.15819   | 6    |
|           | LN    | $\sigma=0.18103$ $\mu=1.2396$                             | 0.16065   | 7    |
|           | W     | $\alpha=6.1983$ $\beta=3.7174$                            | 0.17417   | 8    |
|           | N     | $\sigma=0.67829$ $\mu=3.5129$                             | 0.17782   | 9    |
|           | IG    | $\lambda=94.226$ $\mu=3.5129$                             | 0.18434   | 10   |
|           | L     | $\sigma=0.37396$ $\mu=3.5129$                             | 0.19672   | 11   |
|           | K     | $\alpha_1=0.76014$ $\alpha_2=0.78631$ $a=2.5218$ $b=5.11$ | 0.25901   | 12   |
|           | R     | $\sigma=2.8029$                                           | 0.33461   | 13   |
| September | W     | $\alpha=7.7231$ $\beta=3.7982$                            | 0.123     | 1    |
|           | Na    | $m=11.843$ $\Omega=13.31$                                 | 0.13417   | 2    |
|           | G     | $\alpha=47.806$ $\beta=0.07556$                           | 0.13718   | 3    |
|           | N     | $\sigma=0.5224$ $\mu=3.612$                               | 0.13988   | 4    |
|           | LN    | $\sigma=0.14102$ $\mu=1.2743$                             | 0.14314   | 5    |
|           | GEV   | $k=-0.10967$ $\sigma=0.47534$ $\mu=3.3846$                | 0.14389   | 6    |
|           | LL    | $\alpha=11.168$ $\beta=3.5439$                            | 0.15574   | 7    |
|           | IG    | $\lambda=172.68$ $\mu=3.612$                              | 0.15586   | 8    |
|           | L     | $\sigma=0.28802$ $\mu=3.612$                              | 0.16102   | 9    |
|           | K     | $\alpha_1=0.79997$ $\alpha_2=1.4545$ $a=2.92$ $b=4.8147$  | 0.17102   | 10   |
|           | W-3P  | $\alpha=1.1553$ $\beta=0.72939$ $\gamma=2.9145$           | 0.20807   | 11   |
|           | BS    | $\alpha=0.83169$ $\beta=0.60108$ $\gamma=2.7981$          | 0.23514   | 12   |
|           | R     | $\sigma=2.882$                                            | 0.40147   | 13   |

Table S5. Continued

|          | Model | Parameters                                                            | KS        |      |
|----------|-------|-----------------------------------------------------------------------|-----------|------|
|          |       |                                                                       | Statistic | Rank |
| October  | GEV   | $k=0.07287 \quad \sigma=0.38587 \quad \mu=2.6071$                     | 0.10475   | 1    |
|          | BS    | $\alpha=0.23039 \quad \beta=2.1688 \quad \gamma=0.63331$              | 0.12082   | 2    |
|          | LN    | $\sigma=0.17684 \quad \mu=1.0347$                                     | 0.12469   | 3    |
|          | LL    | $\alpha=9.5823 \quad \beta=2.7722$                                    | 0.12993   | 4    |
|          | W     | $\alpha=6.6061 \quad \beta=3.0066$                                    | 0.13281   | 5    |
|          | L     | $\sigma=0.29746 \quad \mu=2.8597$                                     | 0.13992   | 6    |
|          | G     | $\alpha=28.094 \quad \beta=0.10179$                                   | 0.14248   | 7    |
|          | K     | $\alpha_1=2.3322 \quad \alpha_2=461.04 \quad a=1.6662 \quad b=20.331$ | 0.14585   | 8    |
|          | W-3P  | $\alpha=2.3244 \quad \beta=1.3413 \quad \gamma=1.6683$                | 0.14635   | 9    |
|          | Na    | $m=6.1093 \quad \Omega=8.4595$                                        | 0.15699   | 10   |
|          | N     | $\sigma=0.53953 \quad \mu=2.8597$                                     | 0.16005   | 11   |
|          | IG    | $\lambda=80.339 \quad \mu=2.8597$                                     | 0.1669    | 12   |
|          | R     | $\sigma=2.2817$                                                       | 0.37139   | 13   |
| November | W-3P  | $\alpha=0.86334 \quad \beta=1.5457 \quad \gamma=2.41$                 | 0.1063    | 1    |
|          | GEV   | $k=0.1675 \quad \sigma=0.9692 \quad \mu=3.2466$                       | 0.11678   | 2    |
|          | IG    | $\lambda=28.159 \quad \mu=3.9967$                                     | 0.1257    | 3    |
|          | LL    | $\alpha=5.0922 \quad \beta=3.6568$                                    | 0.12752   | 4    |
|          | BS    | $\alpha=0.99074 \quad \beta=1.187 \quad \gamma=2.2157$                | 0.12901   | 5    |
|          | G     | $\alpha=7.0457 \quad \beta=0.56725$                                   | 0.13675   | 6    |
|          | LN    | $\sigma=0.33339 \quad \mu=1.3265$                                     | 0.15124   | 7    |
|          | W     | $\alpha=3.4889 \quad \beta=4.2632$                                    | 0.1584    | 8    |
|          | N     | $\sigma=1.5057 \quad \mu=3.9967$                                      | 0.17343   | 9    |
|          | L     | $\sigma=0.83013 \quad \mu=3.9967$                                     | 0.1932    | 10   |
|          | K     | $\alpha_1=0.51597 \quad \alpha_2=1.3361 \quad a=2.41 \quad b=10.662$  | 0.20009   | 11   |
|          | Na    | $m=1.3868 \quad \Omega=18.165$                                        | 0.20462   | 12   |
|          | R     | $\sigma=3.1889$                                                       | 0.24842   | 13   |
| December | GEV   | $k=0.00317 \quad \sigma=1.0482 \quad \mu=2.6459$                      | 0.10684   | 1    |
|          | W-3P  | $\alpha=1.1852 \quad \beta=1.7403 \quad \gamma=1.6042$                | 0.10898   | 2    |
|          | IG    | $\lambda=21.161 \quad \mu=3.2542$                                     | 0.11221   | 3    |
|          | LN    | $\sigma=0.38295 \quad \mu=1.1065$                                     | 0.11233   | 4    |
|          | LL    | $\alpha=4.1242 \quad \beta=2.9583$                                    | 0.11633   | 5    |
|          | G     | $\alpha=6.5027 \quad \beta=0.50044$                                   | 0.12035   | 6    |
|          | BS    | $\alpha=0.73798 \quad \beta=1.5709 \quad \gamma=1.2511$               | 0.12113   | 7    |
|          | W     | $\alpha=2.8706 \quad \beta=3.5659$                                    | 0.12827   | 8    |
|          | Na    | $m=1.7278 \quad \Omega=12.166$                                        | 0.13106   | 9    |
|          | N     | $\sigma=1.2761 \quad \mu=3.2542$                                      | 0.16409   | 10   |
|          | L     | $\sigma=0.70357 \quad \mu=3.2542$                                     | 0.17438   | 11   |
|          | R     | $\sigma=2.5965$                                                       | 0.17687   | 12   |
|          | K     | $\alpha_1=0.8786 \quad \alpha_2=1.059 \quad a=1.62 \quad b=5.8324$    | 0.19865   | 13   |

**Table S6.** Distribution parameters for all models used based on daily EAR5-Land data

|          | Model | Parameters                                                             | KS        |      |
|----------|-------|------------------------------------------------------------------------|-----------|------|
|          |       |                                                                        | Statistic | Rank |
| January  | W-3P  | $\alpha=0.84414 \quad \beta=1.7457 \quad \gamma=1.5913$                | 0.0809    | 1    |
|          | GEV   | $k=0.2261 \quad \sigma=1.1353 \quad \mu=2.5195$                        | 0.09346   | 2    |
|          | BS    | $\alpha=1.1544 \quad \beta=1.2165 \quad \gamma=1.4469$                 | 0.09775   | 3    |
|          | IG    | $\lambda=11.982 \quad \mu=3.498$                                       | 0.10245   | 4    |
|          | LL    | $\alpha=3.3608 \quad \beta=2.9924$                                     | 0.10694   | 5    |
|          | LN    | $\sigma=0.4822 \quad \mu=1.1293$                                       | 0.12267   | 6    |
|          | K     | $\alpha_1=0.46857 \quad \alpha_2=1.2828 \quad a=1.5913 \quad b=9.9886$ | 0.12384   | 7    |
|          | G     | $\alpha=3.4254 \quad \beta=1.0212$                                     | 0.13603   | 8    |
|          | W     | $\alpha=2.282 \quad \beta=3.785$                                       | 0.13663   | 9    |
|          | R     | $\sigma=2.791$                                                         | 0.15001   | 10   |
|          | N     | $\sigma=1.89 \quad \mu=3.498$                                          | 0.17911   | 11   |
|          | L     | $\sigma=1.042 \quad \mu=3.498$                                         | 0.19528   | 12   |
|          | Na    | $m=0.78867 \quad \Omega=15.693$                                        | 0.20049   | 13   |
| February | BS    | $\alpha=0.52168 \quad \beta=3.271 \quad \gamma=-0.67318$               | 0.08716   | 1    |
|          | W     | $\alpha=1.6271 \quad \beta=3.2996$                                     | 0.08788   | 2    |
|          | LN    | $\sigma=0.68821 \quad \mu=0.90489$                                     | 0.08934   | 3    |
|          | GEV   | $k=0.04743 \quad \sigma=1.4675 \quad \mu=2.1246$                       | 0.09085   | 4    |
|          | G     | $\alpha=2.6217 \quad \beta=1.1609$                                     | 0.09136   | 5    |
|          | LL    | $\alpha=2.269 \quad \beta=2.3776$                                      | 0.09544   | 6    |
|          | W-3P  | $\alpha=1.509 \quad \beta=3.0744 \quad \gamma=0.26707$                 | 0.09647   | 7    |
|          | IG    | $\lambda=7.9796 \quad \mu=3.0436$                                      | 0.10641   | 8    |
|          | Na    | $m=0.7862 \quad \Omega=12.671$                                         | 0.12343   | 9    |
|          | R     | $\sigma=2.4285$                                                        | 0.1335    | 10   |
|          | K     | $\alpha_1=0.87895 \quad \alpha_2=1.275 \quad a=0.3722 \quad b=7.1619$  | 0.14293   | 11   |
|          | N     | $\sigma=1.8798 \quad \mu=3.0436$                                       | 0.17374   | 12   |
|          | L     | $\sigma=1.0364 \quad \mu=3.0436$                                       | 0.17793   | 13   |
| March    | GEV   | $k=-0.26078 \quad \sigma=1.7488 \quad \mu=3.0361$                      | 0.08386   | 1    |
|          | N     | $\sigma=1.7225 \quad \mu=3.6782$                                       | 0.09716   | 2    |
|          | W-3P  | $\alpha=2.3185 \quad \beta=4.131 \quad \gamma=0.02091$                 | 0.09801   | 3    |
|          | BS    | $\alpha=0.05368 \quad \beta=31.553 \quad \gamma=-27.92$                | 0.10105   | 4    |
|          | R     | $\sigma=2.9348$                                                        | 0.1092    | 5    |
|          | Na    | $m=1.5504 \quad \Omega=16.401$                                         | 0.11483   | 6    |
|          | G     | $\alpha=4.5598 \quad \beta=0.80666$                                    | 0.1153    | 7    |
|          | L     | $\sigma=0.94968 \quad \mu=3.6782$                                      | 0.11585   | 8    |
|          | W     | $\alpha=1.9614 \quad \beta=4.1048$                                     | 0.11994   | 9    |
|          | K     | $\alpha_1=0.99996 \quad \alpha_2=0.99875 \quad a=0.781 \quad b=6.9971$ | 0.13534   | 10   |
|          | IG    | $\lambda=16.772 \quad \mu=3.6782$                                      | 0.14203   | 11   |
|          | LN    | $\sigma=0.56959 \quad \mu=1.1648$                                      | 0.15005   | 12   |
|          | LL    | $\alpha=2.675 \quad \beta=3.123$                                       | 0.17129   | 13   |

Table S6. Continued

|       | Model | Parameters                                                 | KS        |      |
|-------|-------|------------------------------------------------------------|-----------|------|
|       |       |                                                            | Statistic | Rank |
| April | GEV   | $k=-0.21405$ $\sigma=1.8531$ $\mu=3.3462$                  | 0.08221   | 1    |
|       | R     | $\sigma=3.26$                                              | 0.08764   | 2    |
|       | W     | $\alpha=2.1263$ $\beta=4.545$                              | 0.09069   | 3    |
|       | N     | $\sigma=1.8711$ $\mu=4.0858$                               | 0.09293   | 4    |
|       | BS    | $\alpha=0.18648$ $\beta=9.8424$ $\gamma=-5.9277$           | 0.09839   | 5    |
|       | W-3P  | $\alpha=1.7399$ $\beta=3.5805$ $\gamma=0.88487$            | 0.10377   | 6    |
|       | G     | $\alpha=4.7684$ $\beta=0.85686$                            | 0.10658   | 7    |
|       | Na    | $m=1.5566$ $\Omega=20.078$                                 | 0.10837   | 8    |
|       | L     | $\sigma=1.0316$ $\mu=4.0858$                               | 0.11273   | 9    |
|       | LN    | $\sigma=0.5212$ $\mu=1.286$                                | 0.13145   | 10   |
|       | IG    | $\lambda=19.483$ $\mu=4.0858$                              | 0.13299   | 11   |
|       | LL    | $\alpha=2.9457$ $\beta=3.5335$                             | 0.14226   | 12   |
|       | K     | $\alpha_1=1.0519$ $\alpha_2=0.87051$ $a=1.2214$ $b=7.1935$ | 0.17945   | 13   |
| May   | IG    | $\lambda=6.0826$ $\mu=2.3815$                              | 0.08864   | 1    |
|       | BS    | $\alpha=0.4285$ $\beta=3.118$ $\gamma=-1.0227$             | 0.09851   | 2    |
|       | GEV   | $k=0.08781$ $\sigma=1.0785$ $\mu=1.657$                    | 0.10056   | 3    |
|       | G     | $\alpha=2.5541$ $\beta=0.93241$                            | 0.10799   | 4    |
|       | R     | $\sigma=1.9002$                                            | 0.10888   | 5    |
|       | W-3P  | $\alpha=1.5859$ $\beta=2.5378$ $\gamma=0.10162$            | 0.11453   | 6    |
|       | W     | $\alpha=1.5417$ $\beta=2.6114$                             | 0.14083   | 7    |
|       | Na    | $m=0.65626$ $\Omega=7.8204$                                | 0.1424    | 8    |
|       | N     | $\sigma=1.4901$ $\mu=2.3815$                               | 0.15207   | 9    |
|       | LN    | $\sigma=0.72778$ $\mu=0.65035$                             | 0.15222   | 10   |
|       | L     | $\sigma=0.82156$ $\mu=2.3815$                              | 0.15301   | 11   |
|       | LL    | $\alpha=2.1254$ $\beta=1.8443$                             | 0.17713   | 12   |
|       | K     | $\alpha_1=0.79551$ $\alpha_2=1.4606$ $a=0.2067$ $b=6.4303$ | 0.19321   | 13   |
| June  | W-3P  | $\alpha=5.1821$ $\beta=5.8551$ $\gamma=-2.4675$            | 0.12466   | 1    |
|       | GEV   | $k=-0.48521$ $\sigma=1.3049$ $\mu=2.6135$                  | 0.1257    | 2    |
|       | L     | $\sigma=0.67479$ $\mu=2.9205$                              | 0.13886   | 3    |
|       | Na    | $m=2.0908$ $\Omega=9.9776$                                 | 0.14379   | 4    |
|       | BS    | $\alpha=0.00557$ $\beta=216.07$ $\gamma=-213.15$           | 0.14555   | 5    |
|       | N     | $\sigma=1.2239$ $\mu=2.9205$                               | 0.14611   | 6    |
|       | K     | $\alpha_1=1.0$ $\alpha_2=1.0$ $a=0.18318$ $b=5.3948$       | 0.19342   | 7    |
|       | G     | $\alpha=5.694$ $\beta=0.51292$                             | 0.20109   | 8    |
|       | R     | $\sigma=2.3303$                                            | 0.20279   | 9    |
|       | W     | $\alpha=1.4787$ $\beta=3.4935$                             | 0.20528   | 10   |
|       | IG    | $\lambda=16.63$ $\mu=2.9205$                               | 0.22403   | 11   |
|       | LN    | $\sigma=0.69024$ $\mu=0.91546$                             | 0.25637   | 12   |
|       | LL    | $\alpha=1.9317$ $\beta=2.4325$                             | 0.25979   | 13   |

Table S6. Continued

|           | Model | Parameters                                                  | KS        |      |
|-----------|-------|-------------------------------------------------------------|-----------|------|
|           |       |                                                             | Statistic | Rank |
| July      | GEV   | $k=-0.51533$ $\sigma=1.3934$ $\mu=2.4295$                   | 0.09208   | 1    |
|           | W-3P  | $\alpha=10.552$ $\beta=11.195$ $\gamma=-7.9252$             | 0.11724   | 2    |
|           | N     | $\sigma=1.2513$ $\mu=2.7356$                                | 0.13377   | 3    |
|           | K     | $\alpha_1=1.0366$ $\alpha_2=0.96532$ $a=0.19364$ $b=4.7509$ | 0.13427   | 4    |
|           | BS    | $\alpha=0.00577$ $\beta=213.77$ $\gamma=-211.03$            | 0.13547   | 5    |
|           | R     | $\sigma=2.1827$                                             | 0.15379   | 6    |
|           | L     | $\sigma=0.6899$ $\mu=2.7356$                                | 0.15481   | 7    |
|           | Na    | $m=1.9762$ $\Omega=8.9987$                                  | 0.15844   | 8    |
|           | W     | $\alpha=1.4133$ $\beta=3.2448$                              | 0.18012   | 9    |
|           | G     | $\alpha=4.7791$ $\beta=0.5724$                              | 0.1855    | 10   |
|           | LN    | $\sigma=0.74159$ $\mu=0.82218$                              | 0.19577   | 11   |
|           | LL    | $\alpha=1.8562$ $\beta=2.2203$                              | 0.19592   | 12   |
|           | IG    | $\lambda=13.074$ $\mu=2.7356$                               | 0.21021   | 13   |
| August    | GEV   | $k=0.04487$ $\sigma=0.88589$ $\mu=1.755$                    | 0.10764   | 1    |
|           | BS    | $\alpha=0.25624$ $\beta=4.305$ $\gamma=-2.1389$             | 0.11783   | 2    |
|           | G     | $\alpha=3.8091$ $\beta=0.60576$                             | 0.11862   | 3    |
|           | IG    | $\lambda=8.7891$ $\mu=2.3074$                               | 0.11862   | 4    |
|           | W-3P  | $\alpha=2.0732$ $\beta=2.6149$ $\gamma=-0.01285$            | 0.13456   | 5    |
|           | R     | $\sigma=1.841$                                              | 0.14205   | 6    |
|           | Na    | $m=0.91837$ $\Omega=6.6767$                                 | 0.16371   | 7    |
|           | N     | $\sigma=1.1823$ $\mu=2.3074$                                | 0.16708   | 8    |
|           | LN    | $\sigma=0.62898$ $\mu=0.68145$                              | 0.16952   | 9    |
|           | L     | $\sigma=0.65181$ $\mu=2.3074$                               | 0.1706    | 10   |
|           | W     | $\alpha=1.7073$ $\beta=2.6182$                              | 0.18267   | 11   |
|           | LL    | $\alpha=2.3347$ $\beta=1.9125$                              | 0.20672   | 12   |
|           | K     | $\alpha_1=0.90914$ $\alpha_2=1.3155$ $a=0.2353$ $b=5.384$   | 0.22511   | 13   |
| September | L     | $\sigma=0.59703$ $\mu=2.4296$                               | 0.11336   | 1    |
|           | GEV   | $k=-0.20157$ $\sigma=1.0293$ $\mu=2.0096$                   | 0.12936   | 2    |
|           | Na    | $m=1.4102$ $\Omega=7.0366$                                  | 0.1348    | 3    |
|           | N     | $\sigma=1.0829$ $\mu=2.4296$                                | 0.13543   | 4    |
|           | BS    | $\alpha=0.22056$ $\beta=4.7559$ $\gamma=-2.442$             | 0.1455    | 5    |
|           | R     | $\sigma=1.9386$                                             | 0.14571   | 6    |
|           | W-3P  | $\alpha=1.9332$ $\beta=2.2435$ $\gamma=0.43675$             | 0.14688   | 7    |
|           | W     | $\alpha=2.2863$ $\beta=2.6704$                              | 0.15022   | 8    |
|           | G     | $\alpha=5.034$ $\beta=0.48264$                              | 0.15953   | 9    |
|           | K     | $\alpha_1=0.95792$ $\alpha_2=1.5563$ $a=0.651$ $b=5.343$    | 0.1695    | 10   |
|           | LN    | $\sigma=0.49511$ $\mu=0.77735$                              | 0.18192   | 11   |
|           | IG    | $\lambda=12.231$ $\mu=2.4296$                               | 0.18509   | 12   |
|           | LL    | $\alpha=3.1453$ $\beta=2.113$                               | 0.20042   | 13   |

Table S6. Continued

|          | Model | Parameters                                                             | KS        |      |
|----------|-------|------------------------------------------------------------------------|-----------|------|
|          |       |                                                                        | Statistic | Rank |
| October  | Na    | $m=0.73469 \quad \Omega=4.8973$                                        | 0.11274   | 1    |
|          | W-3P  | $\alpha=1.2289 \quad \beta=1.6135 \quad \gamma=0.3587$                 | 0.11274   | 2    |
|          | G     | $\alpha=2.4183 \quad \beta=0.77335$                                    | 0.11619   | 3    |
|          | BS    | $\alpha=0.73203 \quad \beta=1.407 \quad \gamma=0.08448$                | 0.11637   | 4    |
|          | LL    | $\alpha=2.4275 \quad \beta=1.4722$                                     | 0.11831   | 5    |
|          | LN    | $\sigma=0.65277 \quad \mu=0.42116$                                     | 0.12112   | 6    |
|          | GEV   | $k=0.11061 \quad \sigma=0.8625 \quad \mu=1.2671$                       | 0.12173   | 7    |
|          | K     | $\alpha_1=0.81476 \quad \alpha_2=1.3361 \quad a=0.3759 \quad b=4.464$  | 0.12576   | 8    |
|          | IG    | $\lambda=4.5227 \quad \mu=1.8702$                                      | 0.1296    | 9    |
|          | W     | $\alpha=1.704 \quad \beta=2.0166$                                      | 0.13498   | 10   |
|          | R     | $\sigma=1.4922$                                                        | 0.15409   | 11   |
|          | N     | $\sigma=1.2026 \quad \mu=1.8702$                                       | 0.15615   | 12   |
|          | L     | $\sigma=0.66304 \quad \mu=1.8702$                                      | 0.17541   | 13   |
| November | GEV   | $k=-0.05553 \quad \sigma=1.6227 \quad \mu=2.5424$                      | 0.11846   | 1    |
|          | R     | $\sigma=2.7082$                                                        | 0.12684   | 2    |
|          | Na    | $m=0.98815 \quad \Omega=14.908$                                        | 0.12797   | 3    |
|          | W     | $\alpha=1.8553 \quad \beta=3.7048$                                     | 0.13068   | 4    |
|          | G     | $\alpha=3.2878 \quad \beta=1.0324$                                     | 0.13379   | 5    |
|          | K     | $\alpha_1=0.64662 \quad \alpha_2=1.1943 \quad a=0.9047 \quad b=7.8598$ | 0.13873   | 6    |
|          | N     | $\sigma=1.8719 \quad \mu=3.3942$                                       | 0.14459   | 7    |
|          | W-3P  | $\alpha=1.2125 \quad \beta=2.6893 \quad \gamma=0.85179$                | 0.14602   | 8    |
|          | BS    | $\alpha=0.5621 \quad \beta=3.1389 \quad \gamma=-0.24308$               | 0.14942   | 9    |
|          | LN    | $\sigma=0.60454 \quad \mu=1.0554$                                      | 0.15218   | 10   |
|          | IG    | $\lambda=11.159 \quad \mu=3.3942$                                      | 0.16108   | 11   |
|          | LL    | $\alpha=2.5939 \quad \beta=2.7763$                                     | 0.16393   | 12   |
|          | L     | $\sigma=1.032 \quad \mu=3.3942$                                        | 0.16722   | 13   |
| December | GEV   | $k=-0.29354 \quad \sigma=1.6149 \quad \mu=2.2786$                      | 0.12665   | 1    |
|          | K     | $\alpha_1=0.9389 \quad \alpha_2=1.2242 \quad a=0.2378 \quad b=6.2697$  | 0.1287    | 2    |
|          | N     | $\sigma=1.5762 \quad \mu=2.8371$                                       | 0.13194   | 3    |
|          | BS    | $\alpha=0.06212 \quad \beta=24.952 \quad \gamma=-22.163$               | 0.14468   | 4    |
|          | L     | $\sigma=0.86898 \quad \mu=2.8371$                                      | 0.14572   | 5    |
|          | Na    | $m=1.2392 \quad \Omega=10.453$                                         | 0.16705   | 6    |
|          | W-3P  | $\alpha=2.0524 \quad \beta=3.4222 \quad \gamma=-0.19503$               | 0.16773   | 7    |
|          | R     | $\sigma=2.2637$                                                        | 0.17319   | 8    |
|          | W     | $\alpha=1.4596 \quad \beta=3.1762$                                     | 0.17941   | 9    |
|          | G     | $\alpha=3.2402 \quad \beta=0.87562$                                    | 0.19936   | 10   |
|          | LN    | $\sigma=0.75588 \quad \mu=0.82195$                                     | 0.21799   | 11   |
|          | LL    | $\alpha=1.964 \quad \beta=2.1997$                                      | 0.22045   | 12   |
|          | IG    | $\lambda=9.1928 \quad \mu=2.8371$                                      | 0.22905   | 13   |

**Table S7.** Distribution parameters for all models used based whole year data

| Dataset   | Distribution | Parameters                                                | KS        |      |
|-----------|--------------|-----------------------------------------------------------|-----------|------|
|           |              |                                                           | Statistic | Rank |
| Actual    | BS           | $\alpha=0.50946$ $\beta=1.9468$ $\gamma=1.1394$           | 0.02503   | 1    |
|           | GEV          | $k=0.08386$ $\sigma=0.79969$ $\mu=2.8054$                 | 0.02985   | 2    |
|           | LL           | $\alpha=5.6662$ $\beta=3.168$                             | 0.04975   | 3    |
|           | IG           | $\lambda=29.684$ $\mu=3.3389$                             | 0.05447   | 4    |
|           | W-3p         | $\alpha=1.6454$ $\beta=1.963$ $\gamma=1.5886$             | 0.05638   | 5    |
|           | K            | $\alpha_1=1.6409$ $\alpha_2=367.59$ $a=1.589$ $b=73.473$  | 0.05642   | 6    |
|           | LN           | $\sigma=0.31103$ $\mu=1.1554$                             | 0.05689   | 7    |
|           | G            | $\alpha=8.8901$ $\beta=0.37558$                           | 0.07497   | 8    |
|           | Na           | $m=1.8568$ $\Omega=12.399$                                | 0.10279   | 9    |
|           | N            | $\sigma=1.1198$ $\mu=3.3389$                              | 0.11962   | 10   |
|           | L            | $\sigma=0.6174$ $\mu=3.3389$                              | 0.1224    | 11   |
|           | W            | $\alpha=3.8277$ $\beta=3.6777$                            | 0.12296   | 12   |
|           | R            | $\sigma=2.6641$                                           | 0.19858   | 13   |
| CFSR      | GEV          | $k=0.00871$ $\sigma=0.86024$ $\mu=3.091$                  | 0.03288   | 1    |
|           | BS           | $\alpha=0.34431$ $\beta=2.9879$ $\gamma=0.43004$          | 0.03535   | 2    |
|           | IG           | $\lambda=37.081$ $\mu=3.595$                              | 0.03843   | 3    |
|           | LN           | $\sigma=0.29518$ $\mu=1.2352$                             | 0.04449   | 4    |
|           | W-3p         | $\alpha=1.9663$ $\beta=2.3666$ $\gamma=1.4984$            | 0.04709   | 5    |
|           | K            | $\alpha_1=1.9662$ $\alpha_2=1282.2$ $a=1.4991$ $b=91.499$ | 0.04729   | 6    |
|           | LL           | $\alpha=6.0581$ $\beta=3.43$                              | 0.04855   | 7    |
|           | G            | $\alpha=10.314$ $\beta=0.34855$                           | 0.05394   | 8    |
|           | N            | $\sigma=1.1194$ $\mu=3.595$                               | 0.09095   | 9    |
|           | Na           | $m=2.0887$ $\Omega=14.174$                                | 0.0952    | 10   |
|           | L            | $\sigma=0.61715$ $\mu=3.595$                              | 0.10542   | 11   |
|           | W            | $\alpha=4.1566$ $\beta=3.935$                             | 0.10596   | 12   |
|           | R            | $\sigma=2.8684$                                           | 0.20356   | 13   |
| ERA5-Land | K            | $\alpha_1=1.6581$ $\alpha_2=10.333$ $a=0.1129$ $b=13.588$ | 0.03434   | 1    |
|           | W            | $\alpha=1.8484$ $\beta=3.2875$                            | 0.03602   | 2    |
|           | Na           | $m=0.87482$ $\Omega=11.27$                                | 0.03699   | 3    |
|           | W-3p         | $\alpha=1.79$ $\beta=3.2037$ $\gamma=0.07678$             | 0.03809   | 4    |
|           | GEV          | $k=-0.04175$ $\sigma=1.3759$ $\mu=2.1885$                 | 0.0426    | 5    |
|           | BS           | $\alpha=0.37104$ $\beta=4.2118$ $\gamma=-1.5739$          | 0.05152   | 6    |
|           | G            | $\alpha=3.1696$ $\beta=0.92374$                           | 0.05473   | 7    |
|           | R            | $\sigma=2.3361$                                           | 0.05523   | 8    |
|           | IG           | $\lambda=9.2804$ $\mu=2.9279$                             | 0.0829    | 9    |
|           | N            | $\sigma=1.6446$ $\mu=2.9279$                              | 0.08358   | 10   |
|           | LN           | $\sigma=0.6781$ $\mu=0.88463$                             | 0.09755   | 11   |
|           | L            | $\sigma=0.9067$ $\mu=2.9279$                              | 0.10349   | 12   |
|           | LL           | $\alpha=2.5464$ $\beta=2.4138$                            | 0.10553   | 13   |

**Table S8.** Distribution parameters for all models used based monthly data



| Dataset   | Distribution | Parameters                                                  | KS        |      |
|-----------|--------------|-------------------------------------------------------------|-----------|------|
|           |              |                                                             | Statistic | Rank |
| Actual    | L            | $\sigma=0.2589$ $\mu=3.3423$                                | 0.13947   | 1    |
|           | Na           | $m=12.497$ $\Omega=11.373$                                  | 0.15203   | 2    |
|           | BS           | $\alpha=0.09231$ $\beta=4.8422$ $\gamma=-1.5205$            | 0.15529   | 3    |
|           | GEV          | $k=-0.21261$ $\sigma=0.45317$ $\mu=3.1609$                  | 0.15689   | 4    |
|           | G            | $\alpha=50.656$ $\beta=0.06598$                             | 0.15694   | 5    |
|           | W-P3         | $\alpha=2.6918$ $\beta=1.2705$ $\gamma=2.2108$              | 0.15768   | 6    |
|           | N            | $\sigma=0.46959$ $\mu=3.3423$                               | 0.15929   | 7    |
|           | LN           | $\sigma=0.135$ $\mu=1.1976$                                 | 0.16379   | 8    |
|           | IG           | $\lambda=169.31$ $\mu=3.3423$                               | 0.16422   | 9    |
|           | W            | $\alpha=8.4225$ $\beta=3.4298$                              | 0.18915   | 10   |
|           | LL           | $\alpha=11.566$ $\beta=3.2322$                              | 0.23401   | 11   |
|           | K            | $\alpha_1=0.72888$ $\alpha_2=0.69014$ $a=2.4999$ $b=4.3651$ | 0.30852   | 12   |
|           | R            | $\sigma=2.6667$                                             | 0.35761   | 13   |
| CFSR      | GEV          | $k=-0.31896$ $\sigma=0.43414$ $\mu=3.4525$                  | 0.11694   | 1    |
|           | N            | $\sigma=0.41238$ $\mu=3.5957$                               | 0.13276   | 2    |
|           | W-P3         | $\alpha=3.1881$ $\beta=1.262$ $\gamma=2.467$                | 0.13924   | 3    |
|           | Na           | $m=19.454$ $\Omega=13.085$                                  | 0.13967   | 4    |
|           | IG           | $\lambda=273.37$ $\mu=3.5957$                               | 0.14108   | 5    |
|           | G            | $\alpha=76.028$ $\beta=0.04729$                             | 0.14151   | 6    |
|           | BS           | $\alpha=0.01136$ $\beta=34.807$ $\gamma=-31.214$            | 0.14268   | 7    |
|           | LN           | $\sigma=0.11131$ $\mu=1.2736$                               | 0.15075   | 8    |
|           | L            | $\sigma=0.22735$ $\mu=3.5957$                               | 0.15478   | 9    |
|           | W            | $\alpha=9.6138$ $\beta=3.6983$                              | 0.17117   | 10   |
|           | LL           | $\alpha=13.258$ $\beta=3.511$                               | 0.17752   | 11   |
|           | K            | $\alpha_1=0.833$ $\alpha_2=0.80741$ $a=2.8599$ $b=4.3602$   | 0.19793   | 12   |
|           | R            | $\sigma=2.8689$                                             | 0.39156   | 13   |
| ERA5-Land | GEV          | $k=-0.17972$ $\sigma=0.63363$ $\mu=2.6632$                  | 0.098     | 1    |
|           | G            | $\alpha=20.756$ $\beta=0.14125$                             | 0.10856   | 2    |
|           | Na           | $m=5.3871$ $\Omega=8.9752$                                  | 0.10982   | 3    |
|           | W-P3         | $\alpha=2.3936$ $\beta=1.5504$ $\gamma=1.5581$              | 0.11066   | 4    |
|           | N            | $\sigma=0.64352$ $\mu=2.9318$                               | 0.11575   | 5    |
|           | LN           | $\sigma=0.21474$ $\mu=1.053$                                | 0.11779   | 6    |
|           | BS           | $\alpha=0.12436$ $\beta=4.9364$ $\gamma=-2.0427$            | 0.11977   | 7    |
|           | IG           | $\lambda=60.853$ $\mu=2.9318$                               | 0.13768   | 8    |
|           | L            | $\sigma=0.35479$ $\mu=2.9318$                               | 0.13796   | 9    |
|           | W            | $\alpha=4.9216$ $\beta=3.0718$                              | 0.13822   | 10   |
|           | LL           | $\alpha=6.8686$ $\beta=2.7753$                              | 0.14194   | 11   |
|           | K            | $\alpha_1=0.94537$ $\alpha_2=1.1486$ $a=1.8702$ $b=4.0934$  | 0.15933   | 12   |
|           | R            | $\sigma=2.3393$                                             | 0.30188   | 13   |

**Table S9.** Statistical estimators of the daily solar radiation in W/m<sup>2</sup> using various datasets for Az-Zāwiyah

| Month | Dataset   | Mean   | SD    | CV    | Min.   | Max.   | S     | K     | Month | Dataset   | Mean   | SD    | CV    | Min.   | Max.   | S     | K     |
|-------|-----------|--------|-------|-------|--------|--------|-------|-------|-------|-----------|--------|-------|-------|--------|--------|-------|-------|
| Jan   | Measured  | 118.86 | 30.40 | 25.57 | 56.15  | 174.43 | -0.22 | 0.76  | Jul   | Measured  | 324.16 | 11.25 | 3.47  | 274.90 | 334.96 | -3.05 | 12.05 |
|       | CFSR      | 124.16 | 38.21 | 30.78 | 35.50  | 173.25 | -0.88 | 0.56  |       | CFSR      | 325.62 | 4.94  | 1.52  | 315.25 | 333.50 | -0.58 | -0.35 |
|       | ERA5      | 121.51 | 30.89 | 25.42 | 60.00  | 173.84 | -0.30 | 0.70  |       | ERA5      | 324.89 | 6.77  | 2.08  | 301.82 | 332.48 | -1.51 | 3.04  |
|       | ERA5-Land | 118.58 | 31.75 | 26.77 | 45.75  | 177.54 | -0.21 | 0.67  |       | ERA5-Land | 320.89 | 12.39 | 3.86  | 266.42 | 332.95 | -3.06 | 12.27 |
|       | MERRA-2   | 137.13 | 29.10 | 21.22 | 64.17  | 187.93 | -0.43 | -0.12 |       | MERRA-2   | 335.91 | 8.28  | 2.47  | 316.69 | 350.44 | -0.59 | -0.17 |
| Feb   | Measured  | 159.56 | 33.82 | 21.19 | 70.21  | 213.43 | -0.78 | -0.07 | Aug   | Measured  | 288.80 | 11.24 | 3.89  | 265.16 | 308.67 | 0.08  | -0.62 |
|       | CFSR      | 163.50 | 54.80 | 33.55 | 18.80  | 214.00 | -1.44 | 0.14  |       | CFSR      | 299.29 | 17.51 | 5.85  | 279.75 | 378.00 | 3.05  | 13.59 |
|       | ERA5      | 161.51 | 40.53 | 25.10 | 57.11  | 213.71 | -1.12 | -0.37 |       | ERA5      | 294.04 | 11.50 | 3.91  | 273.83 | 330.46 | 0.94  | 1.87  |
|       | ERA5-Land | 160.81 | 35.49 | 22.07 | 68.85  | 215.59 | -0.91 | -0.40 |       | ERA5-Land | 285.78 | 11.47 | 4.01  | 262.54 | 305.67 | 0.00  | -0.73 |
|       | MERRA-2   | 176.32 | 30.69 | 17.40 | 107.51 | 224.60 | -0.58 | -0.21 |       | MERRA-2   | 303.44 | 11.53 | 3.80  | 275.86 | 322.11 | -0.68 | 0.16  |
| Mar   | Measured  | 224.03 | 47.78 | 21.33 | 38.37  | 271.69 | -2.11 | 0.94  | Sep   | Measured  | 246.99 | 25.68 | 10.40 | 188.19 | 274.33 | -0.86 | -0.55 |
|       | CFSR      | 222.95 | 55.11 | 24.72 | 38.25  | 274.25 | -1.87 | 2.75  |       | CFSR      | 251.14 | 22.98 | 9.15  | 191.00 | 276.50 | -1.18 | 0.66  |
|       | ERA5      | 223.49 | 48.62 | 21.75 | 38.31  | 272.97 | -2.08 | -0.79 |       | ERA5      | 249.07 | 23.46 | 9.42  | 199.68 | 275.41 | -0.79 | -0.76 |
|       | ERA5-Land | 225.28 | 48.47 | 21.52 | 39.13  | 274.08 | -2.07 | -0.92 |       | ERA5-Land | 245.40 | 25.88 | 10.54 | 184.73 | 272.32 | -0.83 | -0.56 |
|       | MERRA-2   | 216.66 | 50.22 | 23.18 | 59.17  | 284.61 | -1.11 | 1.78  |       | MERRA-2   | 252.16 | 25.13 | 9.97  | 195.02 | 282.11 | -0.90 | -0.19 |
| Apr   | Measured  | 279.15 | 28.93 | 10.37 | 201.91 | 313.28 | -1.48 | -0.83 | Oct   | Measured  | 186.26 | 19.51 | 10.47 | 153.70 | 216.08 | -0.24 | -1.07 |
|       | CFSR      | 267.1  | 58.2  | 21.79 | 16     | 315.5  | -3.21 | 0.70  |       | CFSR      | 203.04 | 15.28 | 7.52  | 168.00 | 227.25 | -0.18 | -0.43 |
|       | ERA5      | 273.15 | 35.88 | 13.14 | 161.88 | 313.89 | -1.9  | -1.23 |       | ERA5      | 194.65 | 15.88 | 8.16  | 166.73 | 218.90 | 0.02  | -1.02 |
|       | ERA5-Land | 278.31 | 30.94 | 11.12 | 191.45 | 313.54 | -1.54 | -1.09 |       | ERA5-Land | 185.23 | 19.69 | 10.63 | 150.63 | 215.02 | -0.31 | -1.07 |
|       | MERRA-2   | 262.74 | 49.35 | 18.78 | 153.76 | 331.28 | -0.48 | -0.84 |       | MERRA-2   | 206.97 | 17.66 | 8.53  | 165.01 | 238.35 | -0.43 | 0.26  |
| May   | Measured  | 300.38 | 30.95 | 10.30 | 186.38 | 333.31 | -2.04 | 1.84  | Nov   | Measured  | 144.92 | 26.96 | 18.60 | 59.86  | 177.68 | -1.71 | 3.84  |
|       | CFSR      | 309.60 | 51.19 | 16.53 | 52.00  | 345.50 | -4.53 | 2.21  |       | CFSR      | 150.43 | 36.29 | 24.12 | 4.25   | 182.50 | -2.94 | 9.83  |
|       | ERA5      | 304.99 | 39.28 | 12.88 | 119.19 | 339.41 | -3.74 | 1.62  |       | ERA5      | 147.68 | 29.89 | 20.24 | 32.06  | 180.09 | -2.40 | 7.37  |
|       | ERA5-Land | 299.55 | 29.35 | 9.80  | 195.59 | 331.05 | -1.98 | 0.79  |       | ERA5-Land | 144.98 | 26.50 | 18.28 | 67.78  | 177.27 | -1.41 | 2.39  |
|       | MERRA-2   | 312.79 | 40.78 | 13.04 | 204.18 | 358.78 | -1.39 | 1.36  |       | MERRA-2   | 160.30 | 27.50 | 17.15 | 73.34  | 192.10 | -1.71 | 3.40  |
| Jun   | Measured  | 327.83 | 10.82 | 3.30  | 293.11 | 343.39 | -1.79 | 4.45  | Dec   | Measured  | 123.69 | 13.93 | 11.26 | 91.59  | 140.46 | -1.12 | 0.14  |
|       | CFSR      | 329.77 | 11.62 | 3.52  | 273.25 | 342.25 | -4.13 | 20.52 |       | CFSR      | 133.02 | 12.04 | 9.05  | 89.25  | 144.75 | -2.26 | 5.44  |
|       | ERA5      | 328.80 | 10.43 | 3.17  | 285.15 | 342.20 | -2.69 | 10.43 |       | ERA5      | 128.35 | 12.23 | 9.53  | 90.42  | 141.86 | -1.61 | 2.19  |
|       | ERA5-Land | 325.95 | 10.81 | 3.32  | 286.33 | 341.87 | -2.01 | 6.00  |       | ERA5-Land | 126.75 | 15.90 | 12.55 | 86.39  | 143.06 | -1.28 | 0.48  |
|       | MERRA-2   | 339.85 | 15.65 | 4.61  | 284.61 | 360.86 | -1.67 | 4.40  |       | MERRA-2   | 130.98 | 16.48 | 12.58 | 59.59  | 154.18 | -2.96 | 11.60 |

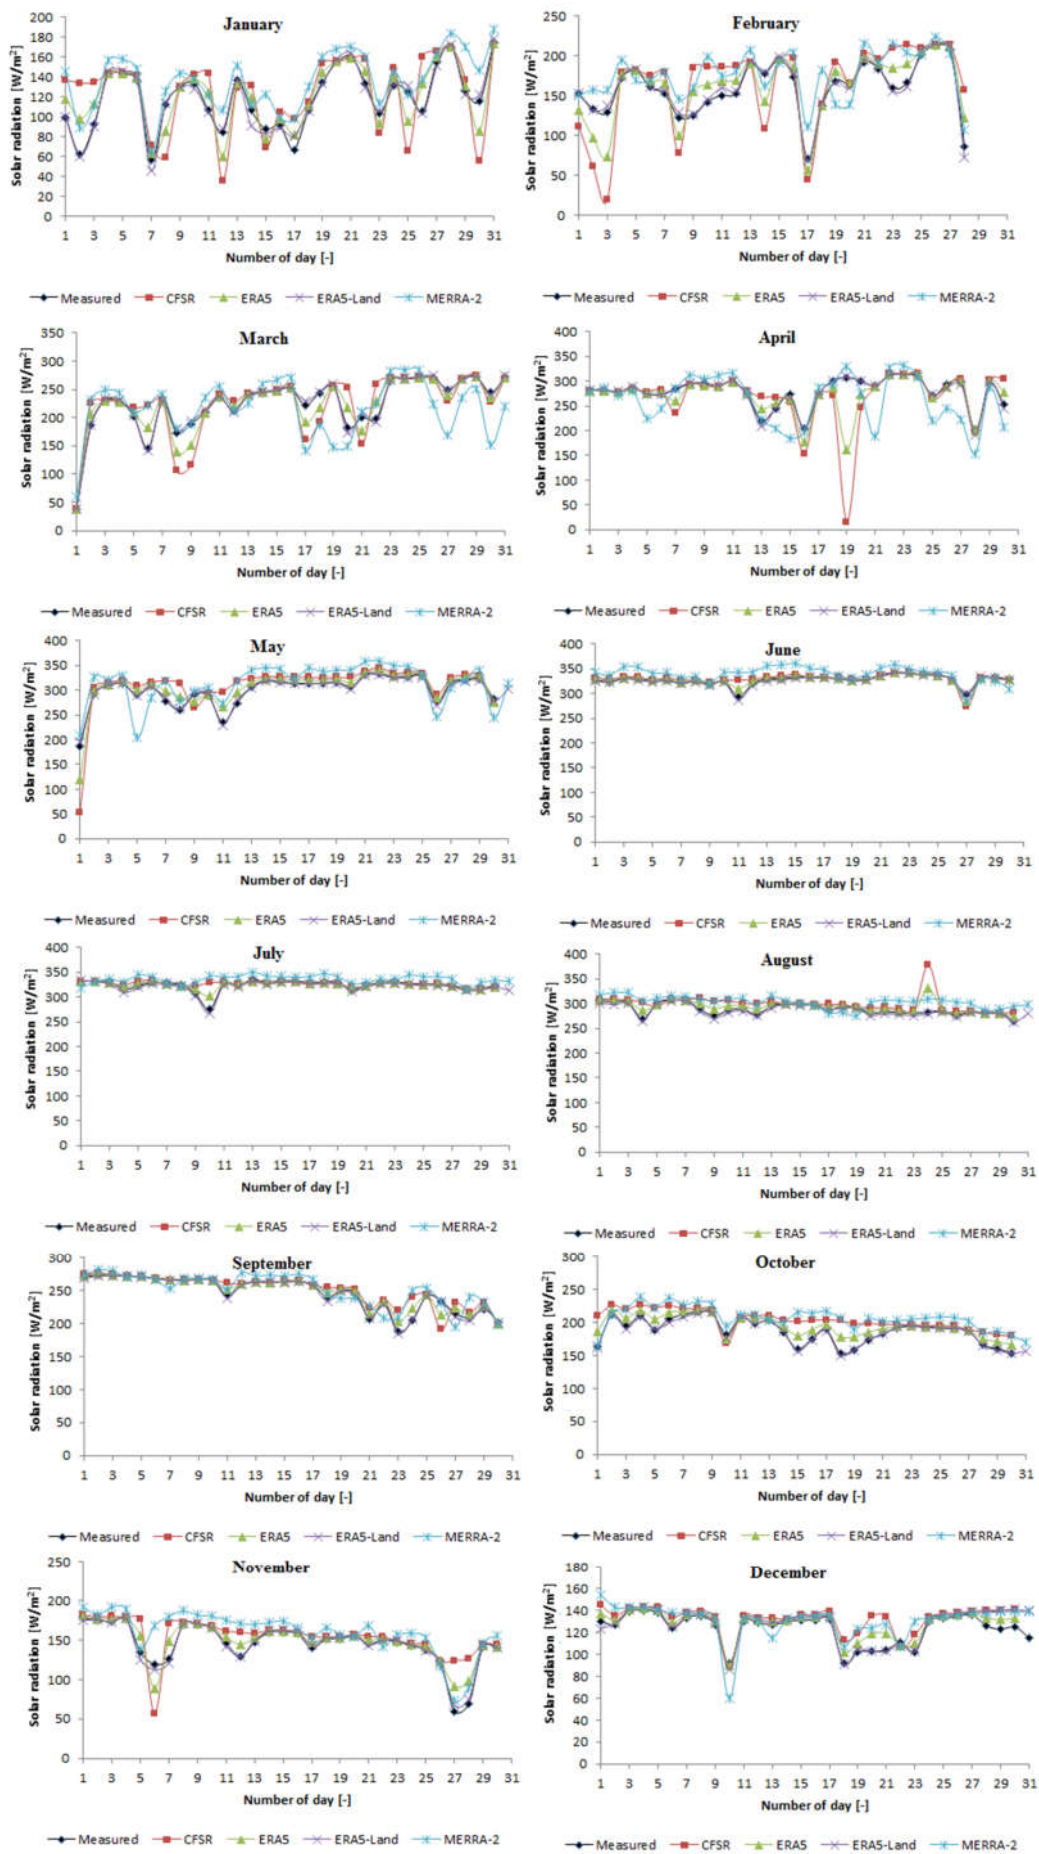

Figure S2. Average daily solar radiation for Az-Zāwiyah during 2022

**Table S10.** Distribution parameters for all models used based on monthly EAR5-Land dataset

| Location    | Model | Parameters                                               | KS        |      |
|-------------|-------|----------------------------------------------------------|-----------|------|
|             |       |                                                          | Statistic | Rank |
| Aljmail     | GEV   | $k=-0.22487$ $\sigma=1.664$ $\mu=4.0918$                 | 0.08722   | 1    |
|             | N     | $\sigma=1.628$ $\mu=4.7433$                              | 0.1037    | 2    |
|             | G     | $\alpha=8.4894$ $\beta=0.55873$                          | 0.11359   | 3    |
|             | W-3P  | $\alpha=1.7986$ $\beta=3.1128$ $\gamma=1.967$            | 0.1152    | 4    |
|             | Na    | $m=2.4439$ $\Omega=24.929$                               | 0.11681   | 5    |
|             | W     | $\alpha=2.9293$ $\beta=5.056$                            | 0.11707   | 6    |
|             | BS    | $\alpha=0.14192$ $\beta=10.965$ $\gamma=-6.3319$         | 0.11753   | 7    |
|             | LN    | $\sigma=0.3517$ $\mu=1.498$                              | 0.11761   | 8    |
|             | K     | $\alpha_1=0.99175$ $\alpha_2=1.0139$ $a=2.37$ $b=7.6054$ | 0.1201    | 9    |
|             | L     | $\sigma=0.89754$ $\mu=4.7433$                            | 0.1209    | 10   |
|             | IG    | $\lambda=40.268$ $\mu=4.7433$                            | 0.12871   | 11   |
|             | LL    | $\alpha=4.0618$ $\beta=4.2632$                           | 0.1621    | 12   |
|             | R     | $\sigma=3.7846$                                          | 0.17805   | 13   |
| Az-Zāwiyah  | GEV   | $k=-0.29787$ $\sigma=1.7401$ $\mu=4.5921$                | 0.09377   | 1    |
|             | N     | $\sigma=1.6367$ $\mu=5.1892$                             | 0.11149   | 2    |
|             | BS    | $\alpha=0.01924$ $\beta=81.178$ $\gamma=-76.003$         | 0.12333   | 3    |
|             | G     | $\alpha=10.052$ $\beta=0.51625$                          | 0.1255    | 4    |
|             | W-3P  | $\alpha=2.207$ $\beta=3.6639$ $\gamma=1.9459$            | 0.12628   | 5    |
|             | L     | $\sigma=0.90238$ $\mu=5.1892$                            | 0.12779   | 6    |
|             | Na    | $m=2.934$ $\Omega=29.383$                                | 0.12872   | 7    |
|             | W     | $\alpha=3.1346$ $\beta=5.5431$                           | 0.14006   | 8    |
|             | LN    | $\sigma=0.32555$ $\mu=1.5964$                            | 0.14477   | 9    |
|             | IG    | $\lambda=52.16$ $\mu=5.1892$                             | 0.14499   | 10   |
|             | LL    | $\alpha=4.3283$ $\beta=4.7264$                           | 0.18322   | 11   |
|             | R     | $\sigma=4.1404$                                          | 0.1941    | 12   |
|             | K     | $\alpha_1=1.0238$ $\alpha_2=0.3597$ $a=1.9907$ $b=7.94$  | 0.43362   | 13   |
| Castelverde | GEV   | $k=-0.1245$ $\sigma=1.538$ $\mu=4.1401$                  | 0.08148   | 1    |
|             | K     | $\alpha_1=0.89492$ $\alpha_2=1.2586$ $a=2.58$ $b=7.9476$ | 0.08926   | 2    |
|             | Na    | $m=2.4241$ $\Omega=25.993$                               | 0.09453   | 3    |
|             | N     | $\sigma=1.6172$ $\mu=4.8575$                             | 0.09751   | 4    |
|             | G     | $\alpha=9.0218$ $\beta=0.53842$                          | 0.10108   | 5    |
|             | W-3P  | $\alpha=1.567$ $\beta=2.766$ $\gamma=2.3602$             | 0.10384   | 6    |
|             | BS    | $\alpha=0.32441$ $\beta=4.7113$ $\gamma=-0.10186$        | 0.11051   | 7    |
|             | LN    | $\sigma=0.3292$ $\mu=1.5278$                             | 0.11188   | 8    |
|             | L     | $\sigma=0.89161$ $\mu=4.8575$                            | 0.11254   | 9    |
|             | IG    | $\lambda=43.823$ $\mu=4.8575$                            | 0.11391   | 10   |
|             | W     | $\alpha=3.2028$ $\beta=5.1308$                           | 0.12409   | 11   |
|             | LL    | $\alpha=4.4761$ $\beta=4.3897$                           | 0.13315   | 12   |
|             | R     | $\sigma=3.8757$                                          | 0.19874   | 13   |

**Table S10.** Continued

| Location  | Model | Parameters                                               | KS        |      |
|-----------|-------|----------------------------------------------------------|-----------|------|
|           |       |                                                          | Statistic | Rank |
| Msallatah | GEV   | $k=-0.02114$ $\sigma=1.3792$ $\mu=4.4255$                | 0.08888   | 1    |
|           | Na    | $m=2.6284$ $\Omega=29.306$                               | 0.09473   | 2    |
|           | G     | $\alpha=10.588$ $\beta=0.4905$                           | 0.09762   | 3    |
|           | W-3P  | $\alpha=1.3239$ $\beta=2.3672$ $\gamma=3.0$              | 0.10437   | 4    |
|           | IG    | $\lambda=54.986$ $\mu=5.1933$                            | 0.1081    | 5    |
|           | K     | $\alpha_1=0.81367$ $\alpha_2=1.4305$ $a=3.09$ $b=8.6792$ | 0.11157   | 6    |
|           | BS    | $\alpha=0.49763$ $\beta=2.9466$ $\gamma=1.8808$          | 0.11608   | 7    |
|           | LN    | $\sigma=0.2916$ $\mu=1.6048$                             | 0.1187    | 8    |
|           | N     | $\sigma=1.596$ $\mu=5.1933$                              | 0.11911   | 9    |
|           | L     | $\sigma=0.87994$ $\mu=5.1933$                            | 0.12397   | 10   |
|           | LL    | $\alpha=5.2549$ $\beta=4.7457$                           | 0.12944   | 11   |
|           | W     | $\alpha=3.7235$ $\beta=5.4272$                           | 0.13      | 12   |
|           | R     | $\sigma=4.1437$                                          | 0.24274   | 13   |
| Sabratah  | GEV   | $k=-0.2391$ $\sigma=1.6829$ $\mu=4.2042$                 | 0.0896    | 1    |
|           | N     | $\sigma=1.6326$ $\mu=4.8467$                             | 0.10627   | 2    |
|           | K     | $\alpha_1=0.87633$ $\alpha_2=1.2223$ $a=2.46$ $b=8.0008$ | 0.10981   | 3    |
|           | G     | $\alpha=8.8128$ $\beta=0.54996$                          | 0.11654   | 4    |
|           | W-3P  | $\alpha=1.8312$ $\beta=3.1657$ $\gamma=2.0264$           | 0.119     | 5    |
|           | W     | $\alpha=2.9762$ $\beta=5.1686$                           | 0.11942   | 6    |
|           | BS    | $\alpha=0.11454$ $\beta=13.633$ $\gamma=-8.8761$         | 0.11971   | 7    |
|           | Na    | $m=2.5437$ $\Omega=25.934$                               | 0.12042   | 8    |
|           | LN    | $\sigma=0.34539$ $\mu=1.5216$                            | 0.12061   | 9    |
|           | L     | $\sigma=0.90011$ $\mu=4.8467$                            | 0.12318   | 10   |
|           | IG    | $\lambda=42.713$ $\mu=4.8467$                            | 0.13143   | 11   |
|           | LL    | $\alpha=4.1247$ $\beta=4.3698$                           | 0.16428   | 12   |
|           | R     | $\sigma=3.8671$                                          | 0.18318   | 13   |

**Table S11.** Distribution parameters for all models used based on monthly CFSR dataset

| Location    | Model | Parameters                                               | KS        |      |
|-------------|-------|----------------------------------------------------------|-----------|------|
|             |       |                                                          | Statistic | Rank |
| Aljmail     | GEV   | $k=-0.43468$ $\sigma=1.3836$ $\mu=4.4744$                | 0.08478   | 1    |
|             | W-3P  | $\alpha=4.4936$ $\beta=4.9881$ $\gamma=0.2979$           | 0.10131   | 2    |
|             | N     | $\sigma=1.2343$ $\mu=4.8375$                             | 0.1132    | 3    |
|             | BS    | $\alpha=0.00869$ $\beta=136.16$ $\gamma=-131.33$         | 0.11617   | 4    |
|             | L     | $\sigma=0.68048$ $\mu=4.8375$                            | 0.11726   | 5    |
|             | IG    | $\lambda=74.31$ $\mu=4.8375$                             | 0.12292   | 6    |
|             | Na    | $m=4.5061$ $\Omega=24.798$                               | 0.12933   | 7    |
|             | G     | $\alpha=15.361$ $\beta=0.31492$                          | 0.1467    | 8    |
|             | W     | $\alpha=3.8017$ $\beta=5.1593$                           | 0.15218   | 9    |
|             | LN    | $\sigma=0.2661$ $\mu=1.5431$                             | 0.16115   | 10   |
|             | K     | $\alpha_1=1.091$ $\alpha_2=0.79379$ $a=2.7016$ $b=6.78$  | 0.17559   | 11   |
|             | LL    | $\alpha=5.1993$ $\beta=4.5239$                           | 0.19676   | 12   |
|             | R     | $\sigma=3.8598$                                          | 0.21846   | 13   |
| Az-Zāwiyah  | GEV   | $k=-0.36819$ $\sigma=1.3752$ $\mu=4.4338$                | 0.07427   | 1    |
|             | N     | $\sigma=1.2507$ $\mu=4.8467$                             | 0.0925    | 2    |
|             | BS    | $\alpha=0.00836$ $\beta=142.56$ $\gamma=-137.72$         | 0.10369   | 3    |
|             | W-3P  | $\alpha=3.2786$ $\beta=3.861$ $\gamma=1.3947$            | 0.10467   | 4    |
|             | Na    | $m=4.3073$ $\Omega=24.924$                               | 0.1072    | 5    |
|             | L     | $\sigma=0.68953$ $\mu=4.8467$                            | 0.11349   | 6    |
|             | G     | $\alpha=15.018$ $\beta=0.32273$                          | 0.12504   | 7    |
|             | IG    | $\lambda=72.786$ $\mu=4.8467$                            | 0.12849   | 8    |
|             | W     | $\alpha=3.8487$ $\beta=5.1595$                           | 0.13434   | 9    |
|             | LN    | $\sigma=0.26462$ $\mu=1.545$                             | 0.14062   | 10   |
|             | LL    | $\alpha=5.3054$ $\beta=4.5313$                           | 0.17779   | 11   |
|             | R     | $\sigma=3.8671$                                          | 0.23059   | 12   |
|             | K     | $\alpha_1=1.1565$ $\alpha_2=0.64533$ $a=2.7837$ $b=6.81$ | 0.24596   | 13   |
| Castelverde | Na    | $m=4.6708$ $\Omega=26.102$                               | 0.08109   | 1    |
|             | G     | $\alpha=17.578$ $\beta=0.28335$                          | 0.08514   | 2    |
|             | BS    | $\alpha=0.0965$ $\beta=11.767$ $\gamma=-6.8405$          | 0.08666   | 3    |
|             | W-3P  | $\alpha=2.2495$ $\beta=2.7111$ $\gamma=2.5799$           | 0.08711   | 4    |
|             | GEV   | $k=-0.22492$ $\sigma=1.2101$ $\mu=4.507$                 | 0.0879    | 5    |
|             | L     | $\sigma=0.65497$ $\mu=4.9808$                            | 0.093     | 6    |
|             | N     | $\sigma=1.188$ $\mu=4.9808$                              | 0.09679   | 7    |
|             | LN    | $\sigma=0.2358$ $\mu=1.5785$                             | 0.09806   | 8    |
|             | IG    | $\lambda=87.555$ $\mu=4.9808$                            | 0.10312   | 9    |
|             | W     | $\alpha=4.4574$ $\beta=5.2411$                           | 0.11194   | 10   |
|             | LL    | $\alpha=6.2064$ $\beta=4.6853$                           | 0.14928   | 11   |
|             | R     | $\sigma=3.9741$                                          | 0.26521   | 12   |
|             | K     | $\alpha_1=1.1622$ $\alpha_2=0.54715$ $a=3.1133$ $b=7.05$ | 0.36915   | 13   |

Table S11. Continued

| Location  | Model | Parameters                                               | KS        |      |
|-----------|-------|----------------------------------------------------------|-----------|------|
|           |       |                                                          | Statistic | Rank |
| Msallatah | W-3P  | $\alpha=1.603$ $\beta=1.9524$ $\gamma=3.7333$            | 0.12004   | 1    |
|           | BS    | $\alpha=0.36174$ $\beta=2.9042$ $\gamma=2.3957$          | 0.12205   | 2    |
|           | GEV   | $k=-0.03342$ $\sigma=0.98563$ $\mu=4.9527$               | 0.12876   | 3    |
|           | LL    | $\alpha=7.9504$ $\beta=5.2148$                           | 0.13637   | 4    |
|           | W     | $\alpha=5.6043$ $\beta=5.701$                            | 0.13747   | 5    |
|           | LN    | $\sigma=0.19446$ $\mu=1.6839$                            | 0.15388   | 6    |
|           | G     | $\alpha=23.453$ $\beta=0.23409$                          | 0.16389   | 7    |
|           | K     | $\alpha_1=0.82515$ $\alpha_2=1.392$ $a=3.89$ $b=7.9561$  | 0.16786   | 8    |
|           | Na    | $m=5.6909$ $\Omega=31.318$                               | 0.17069   | 9    |
|           | N     | $\sigma=1.1336$ $\mu=5.49$                               | 0.19129   | 10   |
|           | IG    | $\lambda=128.76$ $\mu=5.49$                              | 0.19144   | 11   |
|           | L     | $\sigma=0.62501$ $\mu=5.49$                              | 0.19464   | 12   |
|           | R     | $\sigma=4.3804$                                          | 0.32586   | 13   |
| Sabratah  | GEV   | $k=-0.25204$ $\sigma=1.2222$ $\mu=4.7891$                | 0.08291   | 1    |
|           | N     | $\sigma=1.1796$ $\mu=5.245$                              | 0.08624   | 2    |
|           | Na    | $m=5.2652$ $\Omega=28.786$                               | 0.08908   | 3    |
|           | BS    | $\alpha=0.06012$ $\beta=18.775$ $\gamma=-13.563$         | 0.09714   | 4    |
|           | W-3P  | $\alpha=2.3751$ $\beta=2.8111$ $\gamma=2.7554$           | 0.09881   | 5    |
|           | G     | $\alpha=19.77$ $\beta=0.26531$                           | 0.10142   | 6    |
|           | L     | $\sigma=0.65037$ $\mu=5.245$                             | 0.10519   | 7    |
|           | LN    | $\sigma=0.22241$ $\mu=1.6331$                            | 0.11457   | 8    |
|           | IG    | $\lambda=103.69$ $\mu=5.245$                             | 0.11624   | 9    |
|           | W     | $\alpha=4.7166$ $\beta=5.5135$                           | 0.11829   | 10   |
|           | K     | $\alpha_1=0.92003$ $\alpha_2=1.2175$ $a=3.37$ $b=7.2899$ | 0.15235   | 11   |
|           | LL    | $\alpha=6.5608$ $\beta=4.9593$                           | 0.16351   | 12   |
|           | R     | $\sigma=4.1849$                                          | 0.27692   | 13   |

**Table S12.** Wind turbine characteristics

| SunSurfs WT3 Vertical Axis Wind Turbine |               | Endurance Wind Power      |                 |
|-----------------------------------------|---------------|---------------------------|-----------------|
| Type of wind turbine                    | Vertical axis | Type of wind turbine      | Horizontal axis |
| Rated power [kW]                        | 50            | Rated power [kW]          | 50              |
| Startup wind speed [m/s]                | 1.8           | Cut-in wind speed [m/s]   | 3.5             |
| Rated wind speed [m/s]                  | 10            | Rated wind speed [m/s]    | 10              |
| Survival wind speed [m/s]               | 28            | Cut-out wind speed [m/s]  | 25              |
| Rated rotating speed [rpm]              | 40            | Survival wind speed [m/s] | 52.5            |
| Diameter [m]                            | 18            | Diameter [m]              | 19.2            |
| Tower height [m]                        | 14            | Hub height [m]            | 43              |

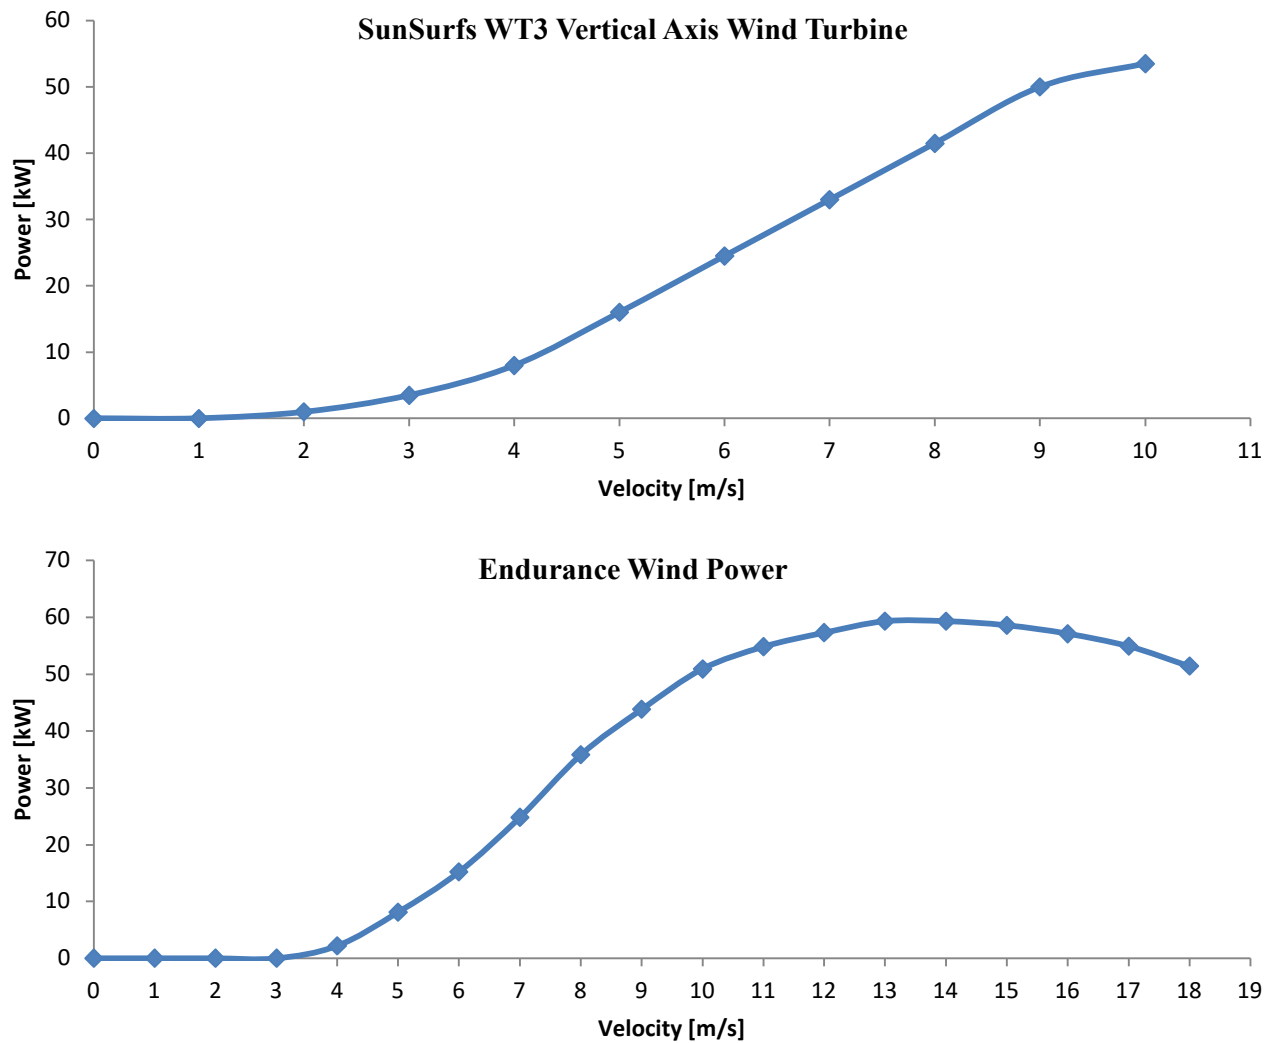

**Figure S3.** Characteristic machine power curves



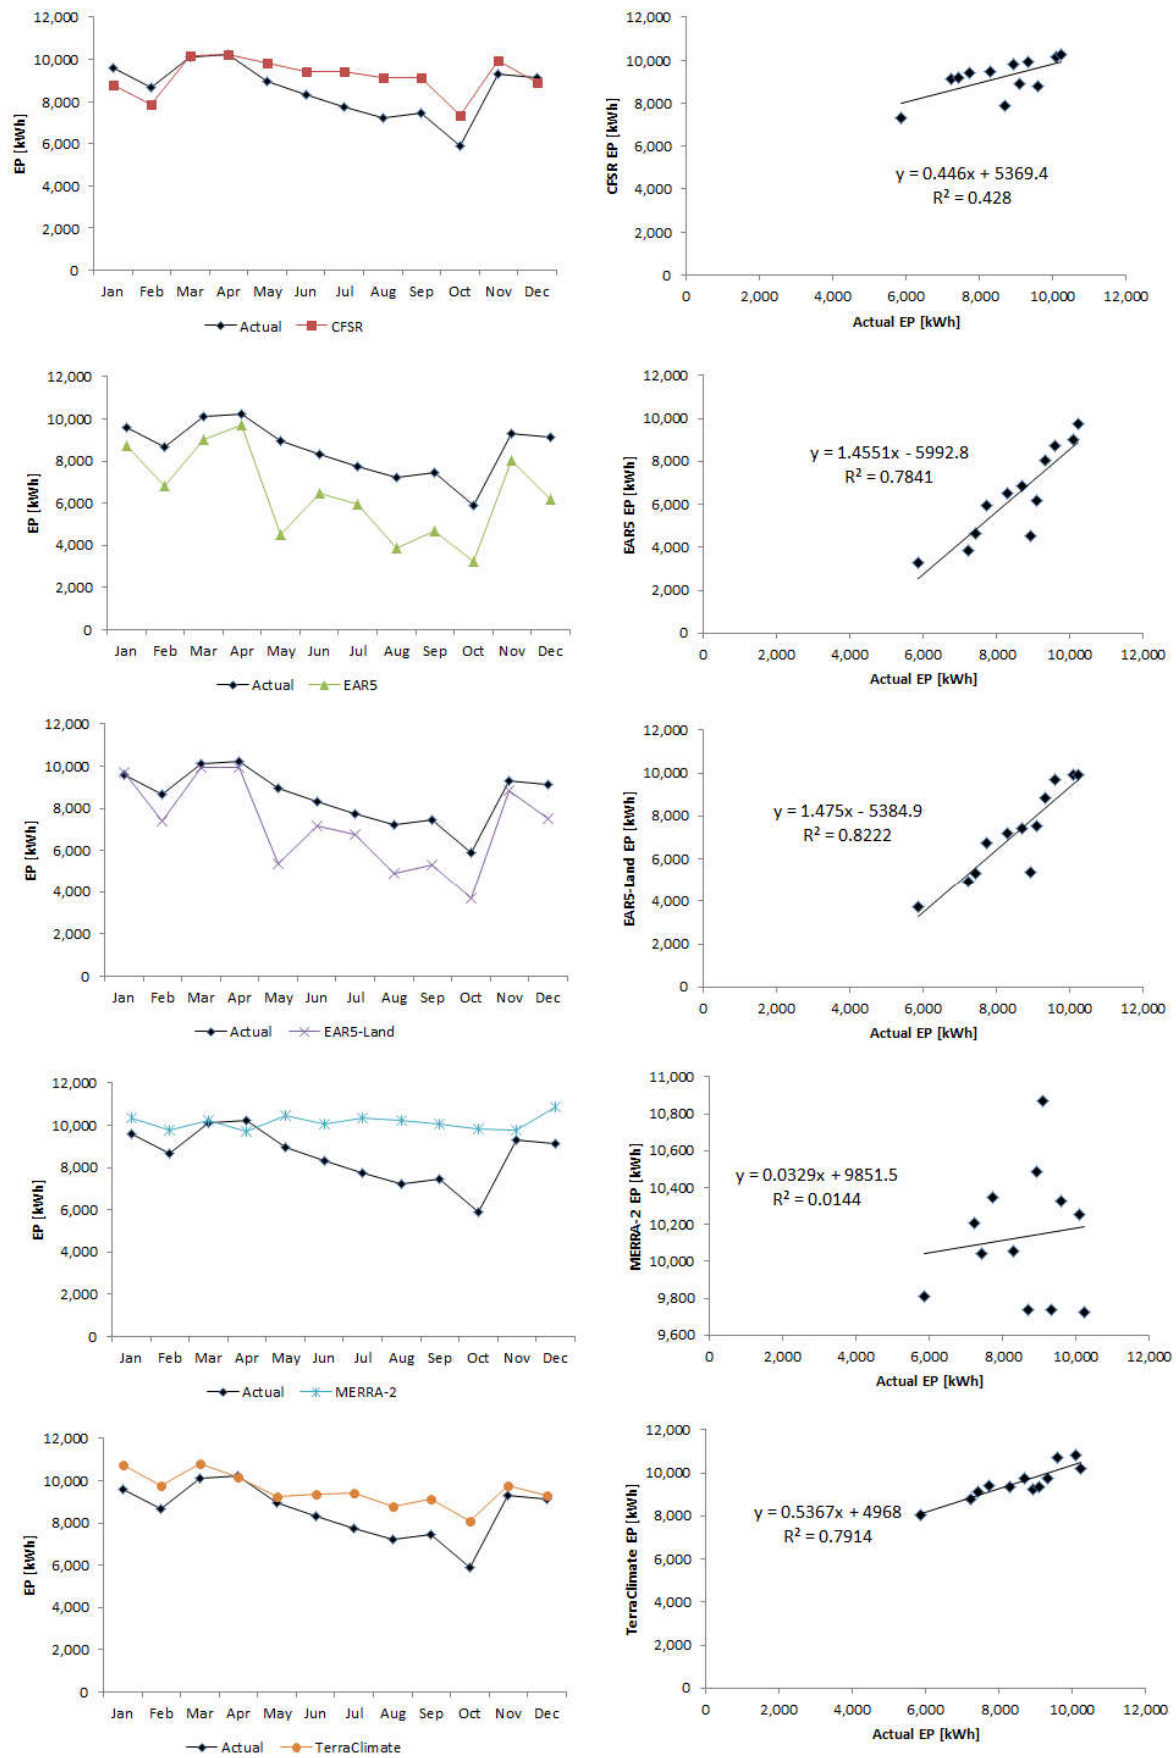

Figure S4. Monthly variation of EP using VAWT

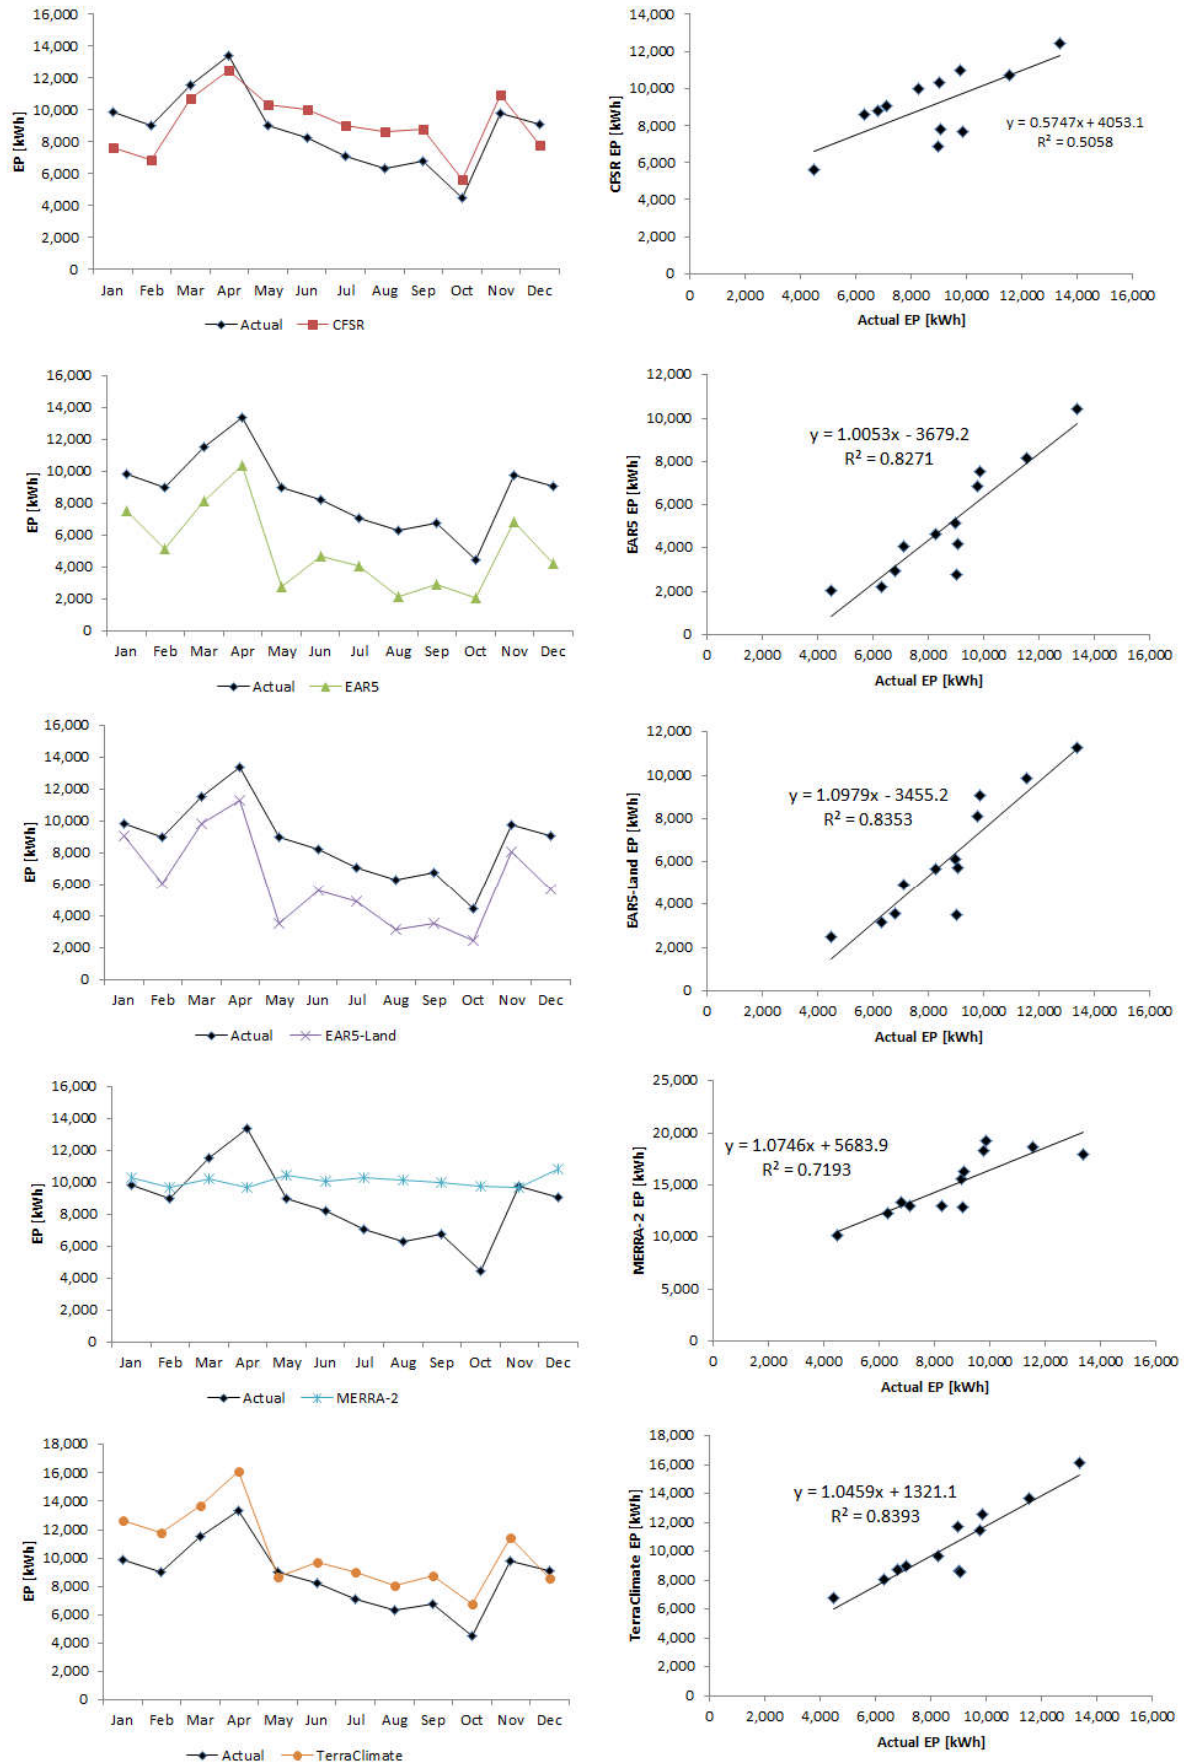

Figure S5. Monthly variation of EP using HAWT

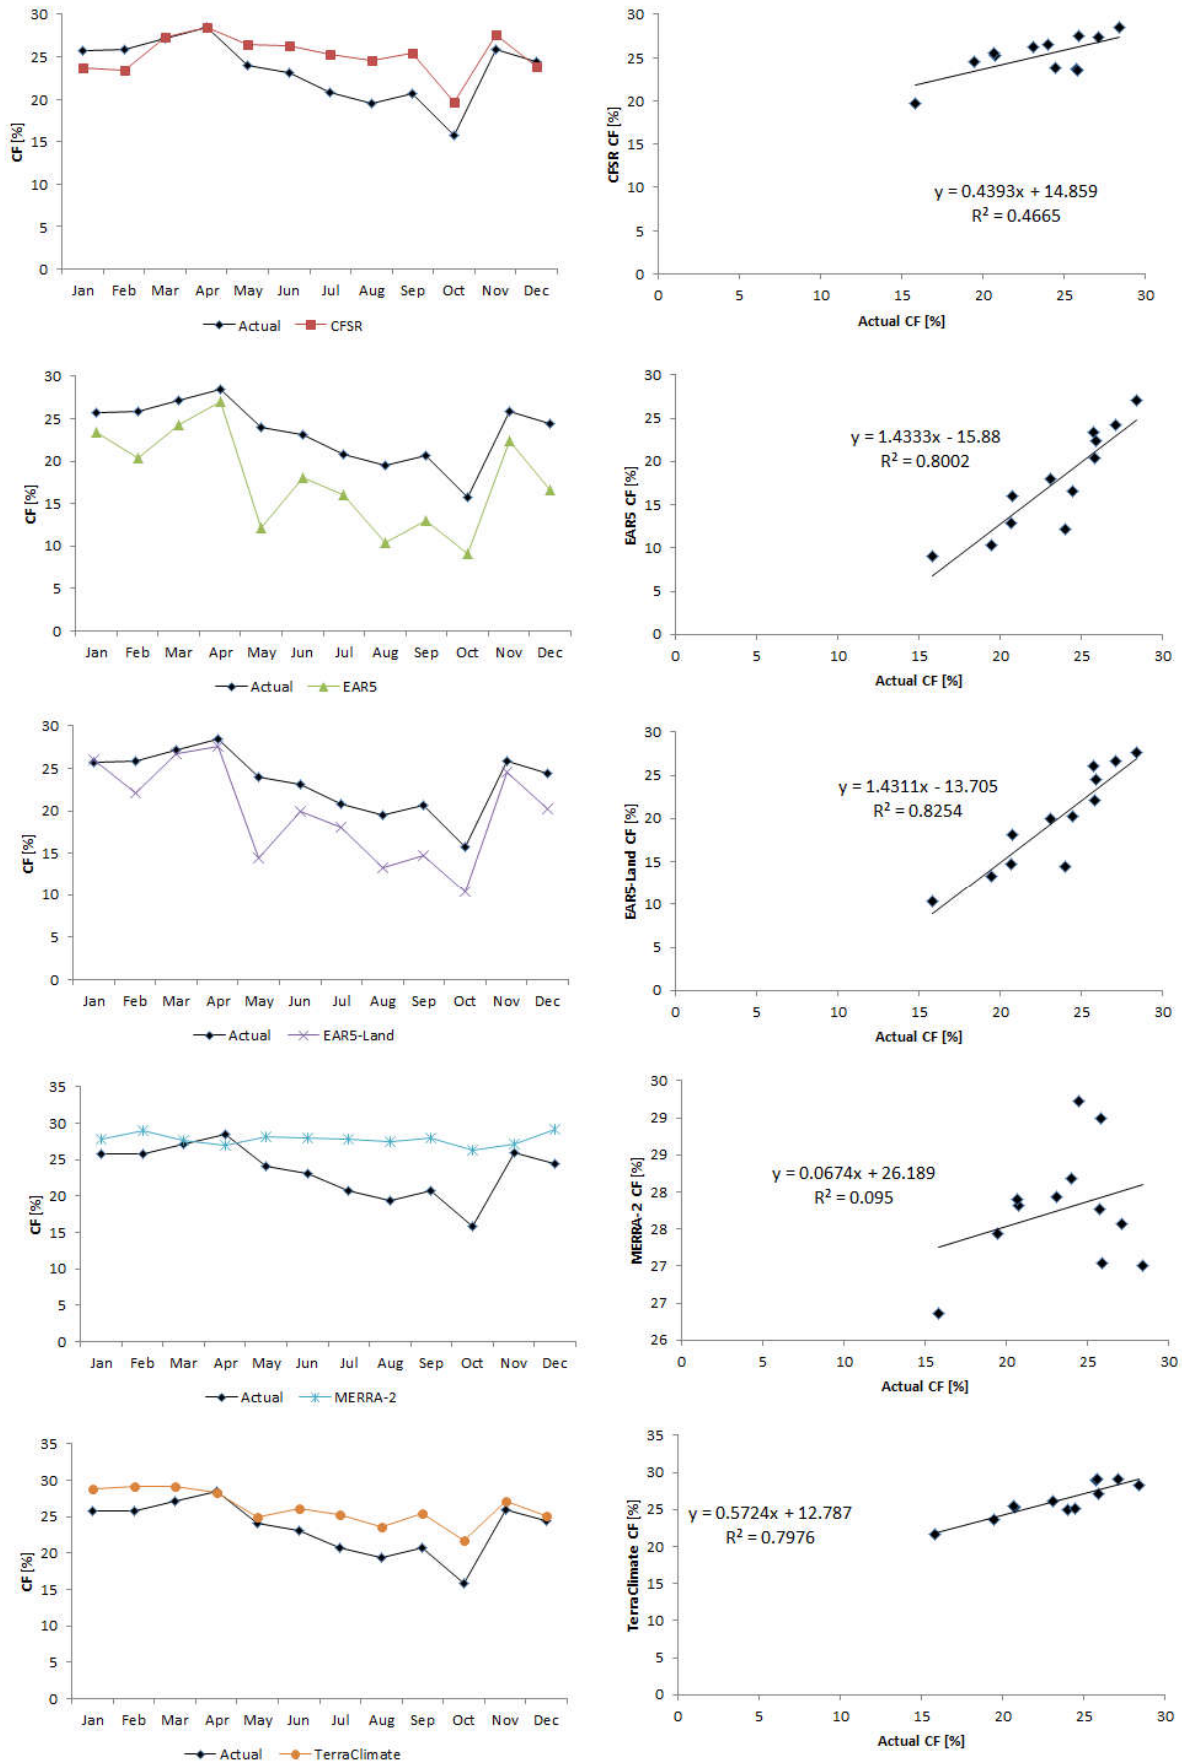

Figure S6. Monthly variation of CF using VAWT

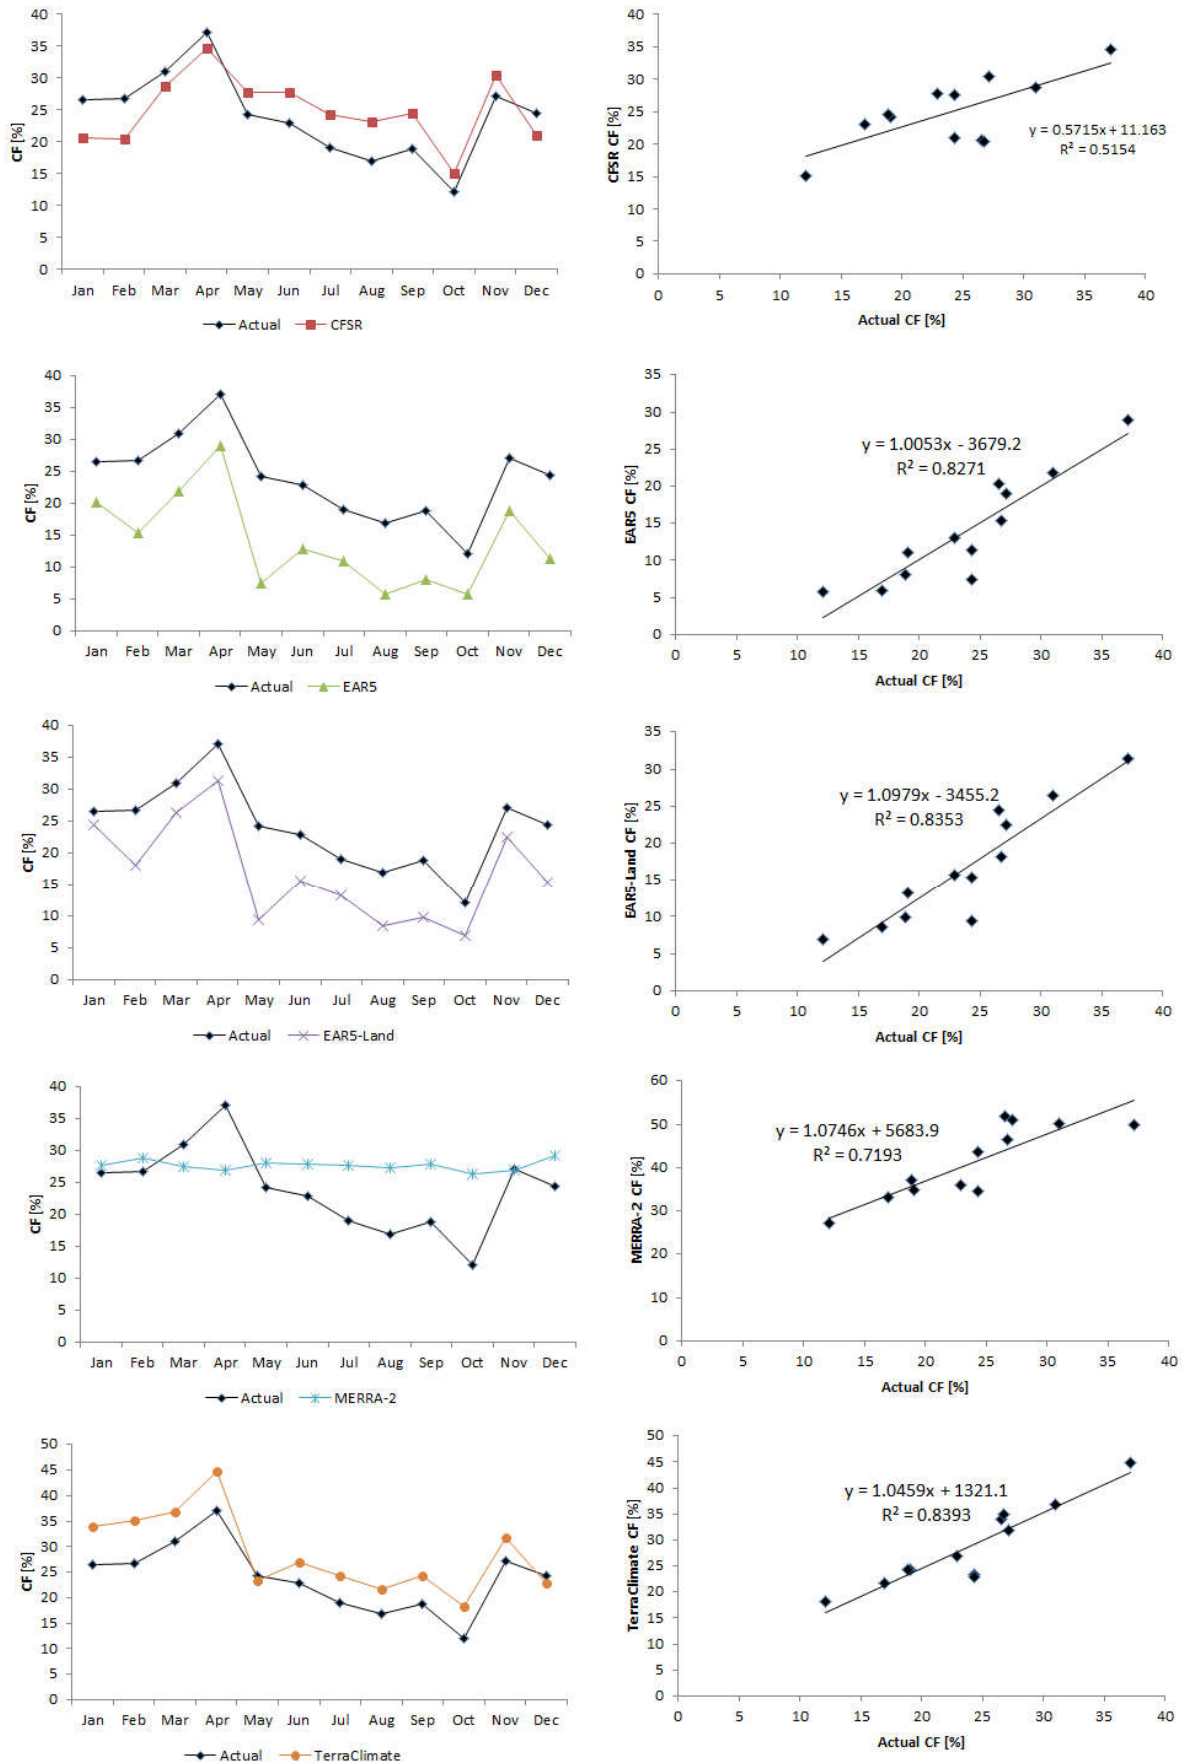

Figure S7. Monthly variation of CF using HAWT

**Table S13.** Specification of selected PV panel

| Item                                          | Specification   |       |
|-----------------------------------------------|-----------------|-------|
| Manufacturer                                  | JinKO solar     |       |
| Model                                         | JKM545M-72HL4-V |       |
|                                               | STC             | NOCT  |
| Maximum Power ( $P_{\max}$ ) [W]              | 545             | 405   |
| The voltage at Maximum Power ( $V_{mp}$ ) [V] | 40.8            | 38.25 |
| Current at Maximum Power ( $I_{mpp}$ ) [A]    | 13.36           | 10.60 |
| Open Circuit Voltage ( $V_{oc}$ ) [V]         | 49.52           | 46.74 |
| Short Circuit Current ( $I_{sc}$ ) [A]        | 13.94           | 11.26 |
| Operating Temperature Range [°C]              | -40°C~+85°C     |       |
| Temperature Coefficient of $P_{\max}$ [%/°C]  | -0.35%/°C       |       |
| Temperature Coefficient of $V_{oc}$ [%/°C]    | -0.28%/°C       |       |
| Temperature Coefficient of $I_{sc}$ [%/°C]    | 0.048%/°C       |       |
| Nominal operating cell temperature (NOCT)     | 45±2°C          |       |
| Cost [USD/W]                                  | 0.37            |       |
